# Supplementary material for: What Would You Do? Types of Ethical Challenging Situations Depicted in Vignettes Published in the Veterinary Literature from 1990 to 2020
Source: MDPI journal article supplement (doi:10.3390/vetsci9010002), 2021-12-22
Supplement: s1 [file s1]

### Supplementary material: Reference list of vignettes analysed in our article.

The vignettes analysed in this article were extracted from the following sources: Web of Science (all databases: CAB Abstracts, Current Contents Connect, BIOSIS Previews and MEDLINE), PubMed, Google Scholar and the University of Sydney Library. Not all articles had a Digital Object Identifier (DOI), however where possible we manually added the DOI or alternate identifier (such as PubMed Central number (PMC); PubMed Central Identification (PMCID); PMID (PubMed Identification); Web of Science (WOS) number; or in the case of books an International Standard Book Number (ISBN).

ABBITT, G. 2010. Legal, ethical and professional issues for veterinary nurses. *The Veterinary Nurse*, 1, 186-188. <https://doi.org/10.12968/vetn.2010.1.3.186>

AGLA, S. & ROLLIN, B. E. 2000. An ethicist's commentary on the veterinarian who asks his employee to lie about a surgical death. *The Canadian Veterinary Journal*, 41, 520-521. PMCID: PMC1476184

ALAVI, T. 2009. Everyday ethics: seeing malpractice? *In Practice*, 31, 250. <https://doi.org/10.1136/inpract.31.5.250>

ANDERSON, N. & ROLLIN, B. E. 1992. Veterinary medical ethics. *The Canadian Veterinary Journal = La revue veterinaire canadienne*, 33, 629-630. 17424085

ANDERSON, N. & ROLLIN, B. E. 2005. Veterinary Medical Ethics Ethical Question of the Month March 2005. *The Canadian Veterinary Journal*, 46, 483-483. PMC3085349

ANDERTON, L. & ROLLIN, B. E. 2005. Veterinary Medical Ethics Ethical Question of the Month January 2005. *The Canadian Veterinary Journal*, 46, 299-299. PMC3085339

ANZUINO, K. 2007. Everyday ethics: conflicting co-owners. *In Practice*, 29, 234-234. <https://doi.org/10.1136/inpract.29.4.234>

ANZUINO, K. 2010. Everyday ethics: disbudding illegally. *In Practice*, 32, 78. <https://doi.org/10.1136/inpract.32.2.78>

APPELT, M. & ROLLIN, B. E. 2012. Veterinary Medical Ethics Ethical Question of the Month May 2012. *The Canadian Veterinary Journal*, 53, 465-468. PMC3327584

ASHALL, V. 2009. Everyday ethics: canine blood donor. *In Practice*, 31, 527-527. <https://doi.org/10.1136/inpract.31.10.527>

ASHALL, V. 2014. Everyday ethics: Euthanasia in a no-kill shelter. *In Practice*, 36, 478. <https://doi.org/10.1136/inp.g5723>

ATKINSON, M. 2006. Everyday ethics: Difficult Dog. *In Practice*, 28, 559. <https://doi.org/10.1136/inpract.28.9.559>

ATKINSON, M. 2007. Everyday ethics: maliciously injured kitten. *In Practice*, 29, 422-422. <https://doi.org/10.1136/inpract.29.7.422>

ATKINSON, M. 2008. Everyday ethics: a patient abroad. *In Practice*, 30, 352-353. <https://doi.org/10.1136/inpract.30.6.352>

AU, C. 2020. Dealing with the client who wishes to take their hyperthyroid ferret home to die naturally. *In Practice*, 42, 309. <https://doi.org/10.1136/inp.m1967>

AWAD, M. & STEPHENS, T. 2016. What to do if a client asks you to change your records for a claim. *Australian Veterinary Journal*, 94, N22-23.

BARKER, C. 2010. Everyday ethics: can't pay, won't pay. *In Practice*, 32, 413-414. <https://doi.org/10.1136/inpract.32.8.413>

- BARTON, F. & ROLLIN, B. 1997. An ethicist's commentary on the case of the bull mastiff with osteosarcoma. *The Canadian Veterinary Journal = La revue veterinaire canadienne*, 38, 536-537. 9285134
- BAZELEY, K. 2007. Everyday ethics: charitable aspirations. *In Practice*, 29, 176.  
<https://doi.org/10.1136/inpract.29.3.176>
- BERNARD, M. A. & ROLLIN, B. 1993. Veterinary medical ethics. *The Canadian Veterinary Journal = La revue veterinaire canadienne*, 34, 519-520. 17424280
- BILL, R. 2016. Convenience Euthanasia. *In*: TRAN, C. V., DESANTIS KERR, A., BILL, R. & WALSH, J. S. (eds.) *Exploring the Gray Zone*. Purdue University Press. <https://doi.org/10.2307/j.ctt163t7qs.8>
- BILL, R. 2016. Popular Party Guy or Ethical Concern? *In*: TRAN, C. V., DESANTIS KERR, A., BILL, R. & WALSH, J. S. (eds.) *Exploring the Gray Zone*. Purdue University Press. <https://doi.org/10.2307/j.ctt163t7qs.19>
- BILL, R. 2016. She Said What? Gossip in the Workplace. *In*: TRAN, C. V., DESANTIS KERR, A., BILL, R. & WALSH, J. S. (eds.) *Exploring the Gray Zone*. Purdue University Press. <https://doi.org/10.2307/j.ctt163t7qs.13>
- BILL, R. 2016. When Roles of Veterinarians and Veterinary Technicians Blur. *In*: TRAN, C. V., DESANTIS KERR, A., BILL, R. & WALSH, J. S. (eds.) *Exploring the Gray Zone*. Purdue University Press.  
<https://doi.org/10.2307/j.ctt163t7qs.16>
- BONNETT, B. & ROLLIN, B. E. 1992. Veterinary medical ethics. *The Canadian Veterinary Journal = La revue veterinaire canadienne*, 33, 220-221. PMID: 17423979
- BROWN, R. 2015. Everyday ethics: Accounting for a lame cow. *In Practice*, 37, 485.  
<https://doi.org/10.1136/inp.h5012>
- BROWN, R. 2015. Everyday ethics: Billy the kid. *In Practice*, 37, 374. <https://doi.org/10.1136/inp.h2818>
- BROWN, R. 2015. Everyday ethics: Delivering profit? *In Practice*, 37, 550. <https://doi.org/10.1136/inp.h5855>
- BROWN, R. 2015. Everyday ethics: Immediate dispatch. *In Practice*, 37, 262. <https://doi.org/10.1136/inp.h2274>
- BROWN, R. 2015. Everyday ethics: Possession is nine-tenths of the dog. *In Practice*, 37, 310.  
<https://doi.org/10.1136/inp.h3223>
- BROWN, R. 2016. Everyday ethics: Questioning morals. *In Practice*, 38, 150. <https://doi.org/10.1136/inp.i863>
- BROWN, R. 2016. Everyday ethics: When in Rome. *In Practice*, 38, 46. <https://doi.org/10.1136/inp.h6401>
- BROWN, R. 2017. Everyday ethics: Witnessing farm animal abuse during work experience. *In Practice*, 39, 342.  
<https://doi.org/10.1136/inp.j3282>
- BRUGMAN, A. 2020. Dealing with a case of suspected 'petfishing'. *In Practice*, 42, 589.  
<https://doi.org/10.1136/inp.m4473>
- BUTTERWORTH, A. & MULLAN, S. 2006. Everyday ethics - Cetacean stranding. *In Practice*, 28, 499-499.  
<https://doi.org/10.1136/inpract.28.8.499>
- CAMPBELL, M. 2016. Everyday ethics: Too hot to handle? *In Practice*, 38, 414. <https://doi.org/10.1136/inp.i4468>
- CANNON, M. 2011. Everyday ethics: Farm cat with TB. *In Practice*, 33, 46. <https://doi.org/10.1136/inp.c7331>
- CASEY, R. 2011. Everyday ethics: mammary mass in an overweight dog. *In Practice*, 33, 493-494.  
<https://doi.org/10.1136/inp.d5746>

- CEELEN, H. & ROLLIN, B. E. 1998. An ethicist's commentary on maintaining confidentiality in the face of a previous client selling sick animals. *The Canadian Veterinary Journal = La revue veterinaire canadienne*, 39, 72-73. 10051954
- CHEUNG, W. & FAWCETT, A. 2019. Managing a high publicity crowdfunded shelter puppy with head trauma. *In Practice*, 41, 182-3. <https://doi.org/10.1136/inp.l1889>
- CHEUNG, W. & FAWCETT, A. 2019. Rehoming a surrendered dog to its original owner. *In Practice*, 41, 278-278. <https://doi.org/10.1136/inp.l4489>
- CHOW, L. & ROLLIN, B. E. 2016. Veterinary Medical Ethics Ethical question of the month — November 2016. *The Canadian Veterinary Journal*, 57, 1123-1126. PMC5081141
- COGHLAN, S. 2017. Everyday ethics: Euthanasing treatable patients. *In Practice*, 39, 190. <https://doi.org/10.1136/inp.j1256>
- COGHLAN, S. 2017. Everyday ethics: When the client is away. *In Practice*, 39, 94-95. <https://doi.org/10.1136/inp.j371>
- COGHLAN, S. 2018. Everyday ethics: Dealing with dogs that bite. *In Practice*, 40, 470. <https://doi.org/10.1136/inp.k4938>
- COGHLAN, S. 2018. Everyday ethics: Legal status and malpractice. *In Practice*, 40, 78. <https://doi.org/10.1136/inp.k823>
- COGHLAN, S. 2019. Enrolling in animal-assisted therapy programmes. *In Practice*, 41, 134. <https://doi.org/10.1136/inp.l1611>
- COGHLAN, S. & CARDILINI, A. 2019. When your views on climate change conflict with your chosen career path. *In Practice*, 41, 461. <https://doi.org/10.1136/inp.l6101>
- COLES, G. 2010. Everyday ethics: advice on horse worming. *In Practice*, 32, 170-170. <https://doi.org/10.1136/inp.c1532>
- COLLINS, J. 2014. Everyday ethics: Looking a store horse in the mouth. *In Practice*, 36, 158. <https://doi.org/10.1136/inp.g1426>
- COOMBS, C. & ROLLIN, B. E. 1996. An ethicist's commentary on the case of whether a veterinarian is obliged to relate a previous employee's history of drug abuse to a prospective employer. *The Canadian Veterinary Journal = La revue veterinaire canadienne*, 37, 456-457. 8853879
- COUGHLIN, B. & ROLLIN, B. E. 1998. An ethicist's commentary on the case of the cat who fractures both legs after a declaw. *The Canadian Veterinary Journal = La revue veterinaire canadienne*, 39, 337-338. 9635169
- COUSQUER, G. 2011. Everyday ethics: pet insurance problem. *In Practice*, 33, 237-238. <https://doi.org/10.1136/inp.d2287>
- COUSQUER, G. 2011. Everyday ethics: Principled profit-sharing? *In Practice*, 33, 142. <https://doi.org/10.1136/inp.d957>
- COUSQUER, G. 2012. Everyday ethics: Grey squirrel treatment and hand-rearing. *In Practice*, 34, 550-551. <https://doi.org/10.1136/inp.e6272>
- COUSQUER, G. 2013. Everyday ethics: Being a badger's advocate. *In Practice*, 35, 350-U58. <https://doi.org/10.1136/inp.f3383>
- COUSQUER, G. 2015. Everyday ethics: Emergency exsanguination of working equids. *In Practice*, 37, 102-U38. <https://doi.org/10.1136/inp.h96>

- CRANLEY, J. 2017. Everyday ethics: Ethical issues in the slaughterhouse. *In Practice*, 39, 430.  
<https://doi.org/10.1136/inpj.4497>
- CULJAT-VUKMAN, E. 2020. Reporting a case of suspected dog fighting. *In Practice*, 42, 365.  
<https://doi.org/10.1136/inp.m2393>
- CVJ 1990. Veterinary medical ethics. *The Canadian Veterinary Journal = La revue veterinaire Canadienne*, 31, 739-739
- CVJ AND ROLLIN, B. E. 2007. Veterinary Medical Ethics Ethical Question of the Month August 2007. *The Canadian Veterinary Journal*, 48, 791-792. PMC1914309
- CVJ AND ROLLIN, B. E. 2007. Veterinary Medical Ethics Ethical Question of the Month July 2007. *The Canadian Veterinary Journal*, 48, 679-682. PMC1899841
- CVJ AND ROLLIN, B. E. 2007. Veterinary Medical Ethics Ethical Question of the Month September 2007. *The Canadian Veterinary Journal*, 48, 895-898. PMC1950106
- DE SANTIS KERR, A. 2016. How Much Help Is Too Much Help? *In*: DESANTIS KERR, A., BILL, R., X201C, PETE, X201D, WALSH, J. S. & TRAN, C. V. (eds.) *Exploring the Gray Zone*. Purdue University Press.  
<https://doi.org/10.2307/j.ctt163t7qs.6>
- DELANEY, K. & ROLLIN, B. E. 1997. An ethicist's commentary on the case of the infected research animal. *The Canadian Veterinary Journal = La revue veterinaire canadienne*, 38, 136-136. 9056065
- DENNISON, T. 2009. Everyday ethics: dog needs a new home. *In Practice*, 31, 147-147.  
<https://doi.org/10.1136/inpract.31.3.147>
- DENNISON, T. & MULLAN, S. 2009. Everyday ethics: vaccination with a twitch. *In Practice*, 31, 302-303.  
<https://doi.org/10.1136/inpract.31.6.302>
- DESANTIS KERR, A. 2016. Between a Rock and a Hard Place. *In*: TRAN, C. V., DESANTIS KERR, A., BILL, R. & WALSH, J. S. (eds.) *Exploring the Gray Zone*. Purdue University Press. <https://doi.org/10.2307/j.ctt163t7qs.10>
- DESANTIS KERR, A. 2016. Compliment? Or Reason for Concern? *In*: TRAN, C. V., DESANTIS KERR, A., BILL, R. & WALSH, J. S. (eds.) *Exploring the Gray Zone*. Purdue University Press.  
<https://doi.org/10.2307/j.ctt163t7qs.30>
- DESANTIS KERR, A. 2016. Contagious Disease and Confidentiality. *In*: TRAN, C. V., DESANTIS KERR, A., BILL, R. & WALSH, J. S. (eds.) *Exploring the Gray Zone*. Purdue University Press.  
<https://doi.org/10.2307/j.ctt163t7qs.15>
- DESANTIS KERR, A. 2016. The Helpful Neighbor or the Meddling Neighbor? *In*: TRAN, C. V., DESANTIS KERR, A., BILL, R. & WALSH, J. S. (eds.) *Exploring the Gray Zone*. Purdue University Press.  
<https://doi.org/10.2307/j.ctt163t7qs.31>
- DESANTIS KERR, A. 2016. On Call Dilemma. *In*: TRAN, C. V., DESANTIS KERR, A., BILL, R. & WALSH, J. S. (eds.) *Exploring the Gray Zone*. Purdue University Press. <https://doi.org/10.2307/j.ctt163t7qs.28>
- DESANTIS KERR, A. 2016. Standard of Care? *In*: TRAN, C. V., DESANTIS KERR, A., BILL, R. & WALSH, J. S. (eds.) *Exploring the Gray Zone*. Purdue University Press. <https://doi.org/10.2307/j.ctt163t7qs.17>
- DESANTIS KERR, A. 2016. Suspicious Client? *In*: TRAN, C. V., DESANTIS KERR, A., BILL, R. & WALSH, J. S. (eds.) *Exploring the Gray Zone*. Purdue University Press. <https://doi.org/10.2307/j.ctt163t7qs.23>
- DESANTIS KERR, A. 2016. What about the Lambs? *In*: TRAN, C. V., DESANTIS KERR, A., BILL, R. & WALSH, J. S. (eds.) *Exploring the Gray Zone*. Purdue University Press. <https://doi.org/10.2307/j.ctt163t7qs.12>

- DESANTIS KERR, A. 2016. What's in an answer? *In*: TRAN, C. V., DESANTIS KERR, A., BILL, R. & WALSH, J. S. (eds.) *Exploring the Gray Zone*. Purdue University Press. <https://doi.org/10.2307/j.ctt163t7qs.18>
- DILLMAN, E. & ROLLIN, B. E. 2006. Ethical Question of the Month November 2005. *The Canadian Veterinary Journal*, 47, 109-110. PMC3085498
- DIXON, G. 2006. Everyday ethics: Gets Your Goat. *In Practice*, 28, 298-299. <https://doi.org/10.1136/inpract.28.5.298>
- DIXON, G. 2008. Everyday ethics: shooting for pleasure. *In Practice*, 30, 584. <https://doi.org/10.1136/inpract.30.10.584>
- DUBOIS BISSETT, A. & ROLLIN, B. E. 1994. An ethicist's commentary on the case of a referral practice attempting to "steal" clients. *The Canadian Veterinary Journal = La revue veterinaire canadienne*, 35, 262-262. 8050071
- DUFFIELD, T. & ROLLIN, B. E. 2015. Veterinary Medical Ethics Ethical question of the month — January 2015. *The Canadian Veterinary Journal*, 56, 15-17. PMC4266050
- DYKES, L. 2008. Everyday ethics: rabbit tooth abscess. *In Practice*, 30, 232. <https://doi.org/10.1136/inpract.30.4.232>
- ENTICOTT, G. 2010. Everyday ethics: TB testing protocol. *In Practice*, 32, 318-319. <https://doi.org/10.1136/inp.c3677>
- EVANS, E. 2020. Performing emergency care without client consent. *In Practice*, 42, 181. <https://doi.org/10.1136/inp.m1144>
- FAFARD, A. & ROLLIN, B. E. 2012. Veterinary Medical Ethics Ethical Question of the Month July 2012. *The Canadian Veterinary Journal*, 53, 705-707. PMC3377454
- FAWCETT, A. 2009. Everyday ethics: how much information? *In Practice*, 31, 409-409. <https://doi.org/10.1136/inpract.31.8.409>
- FAWCETT, A. 2010. Everyday ethics: Insulin overdose. *In Practice*, 32, 270. <https://doi.org/10.1136/inp.c2931>
- FAWCETT, A. 2010. Everyday ethics: the wrong vaccine. *In Practice*, 32, 214-215. <https://doi.org/10.1136/inpract.32.4.214>
- FAWCETT, A. 2013. Everyday ethics: Anaesthetic death: who pays? *In Practice*, 35, 286-U83. <https://doi.org/10.1136/inp.f2556>
- FAWCETT, A. 2017. Everyday ethics: Brachycephalic dogs and honesty with clients. *In Practice*, 39, 45. <https://doi.org/10.1136/inp.i6329>
- FAWCETT, A. 2018. Everyday ethics: One health and antimicrobial resistance. *In Practice*, 40, 126-126. <https://doi.org/10.1136/inp.k1442>
- FAWCETT, A. 2019. Feeding cats a plant-based diet. *In Practice*, 41, 341. <https://doi.org/10.1136/inp.l4950>
- FAWCETT, A. & BAGULEY, J. 2011. Everyday ethics: Social media menace? *In Practice*, 33, 190. <https://doi.org/10.1136/inp.d1698>
- FAWCETT, A. & BRAILEY, J. 2012. Everyday ethics: Are you positive? the fate of a shelter cat. *In Practice*, 34, 614- <https://doi.org/10.1136/inp.e6710>
- FAWCETT, A. & BRAILEY, J. 2017. Everyday ethics: Taking a full lunch break. *In Practice*, 39, 238-239. <https://doi.org/10.1136/inp.j1971>

- FAWCETT, A. & CHADWICK, M. 2018. Everyday ethics: Clients who cannot afford to pay. *In Practice*, 40, 38. <https://doi.org/10.1136/inp.k118>
- FAWCETT, A. & GOTTLIEB, T. 2017. Everyday ethics: Performance indicators and prescribing antimicrobials. *In Practice*, 39, 382. <https://doi.org/10.1136/inp.j4004>
- FAWCETT, A. & WOON, S. 2013. Everyday ethics: Pest or patient? *In Practice*, 35, 614. <https://doi.org/10.1136/inp.f6114>
- FLEMMING, B. I. & ROLLIN, B. E. 2000. An ethicist's commentary on the case of client who won't euthanize a suffering foal. *The Canadian Veterinary Journal*, 41, 830-831. PMC1476429
- FOELL, C. & ROLLIN, B. E. 1997. Ethicist's second commentary on the case of the stray tattooed beagle. *The Canadian Veterinary Journal = La revue veterinaire canadienne*, 38, 472-473. 9262855
- FORDYCE, P. 2011. Everyday ethics: violent vet. *In Practice*, 33, 94-95. <https://doi.org/10.1136/inp.d297>
- FORDYCE, P. 2013. Everyday ethics: Honesty and euthanasia. *In Practice*, 35, 422. <https://doi.org/10.1136/inp.f4458>
- FORDYCE, P. 2017. Everyday ethics: When the client cannot pay. *In Practice*, 39, 142-U80. <https://doi.org/10.1136/inp.j905>
- FORREST, N. 2008. Everyday ethics: a question of ownership. *In Practice*, 30, 292. <https://doi.org/10.1136/inpract.30.5.292>
- FORREST, N. 2008. Everyday ethics: veterinary nurse uneasy with vet's approach. *In Practice*, 30, 292. <https://doi.org/10.1136/inpract.29.8.489>
- GARDINER, A. 2007. Everyday ethics: has small animal practice gone too far. *In Practice*, 29, 553-553. <https://doi.org/10.1136/inpract.29.9.553>
- GARTLEY, C. & ROLLIN, B. E. 1991. Veterinary medical ethics. *The Canadian Veterinary Journal = La revue veterinaire canadienne*, 32, 390-391. 17423815
- GERROW, T. & ROLLIN, B. E. 1994. An ethicist's commentary on the case of the improperly labelled prescription. *The Canadian Veterinary Journal = La revue veterinaire canadienne*, 35, 202-203. 8076275
- GODKIN, A. & ROLLIN, B. 1993. Veterinary medical ethics. *The Canadian Veterinary Journal = La revue veterinaire canadienne*, 34, 72-73. 17424174
- GODKIN, A. & ROLLIN, B. E. 2015. Veterinary Medical Ethics Ethical question of the month — February 2015. *The Canadian Veterinary Journal*, 56, 121-122. PMC4298261
- GODKIN, A. & ROLLIN, B. E. 2017. Veterinary Medical Ethics Ethical question of the month - August 2017. *The Canadian Veterinary Journal = La revue veterinaire canadienne*, 58, 781-783. 28761182
- GOEREE, G. & ROLLIN, B. E. 2001. An ethicist's commentary on veterinary involvement with laws banning pitbulls and pitbull crosses. *The Canadian Veterinary Journal = La revue veterinaire canadienne*, 42, 258-259. 11326629
- GOEREE, G. & ROLLIN, B. E. 2008. Veterinary Medical Ethics Ethical Question of the Month January 2008. *The Canadian Veterinary Journal*, 49, 15-16. PMC2147688
- GOEREE, G. & ROLLIN, B. E. 2008. Veterinary Medical Ethics Ethical Question of the Month September 2008. *The Canadian Veterinary Journal*, 49, 845-846. PMC2519904

- GREEN, R. 2007. Everyday ethics: charity's stance on hereditary defects. *In Practice*, 29, 624. <https://doi.org/10.1136/inpract.29.10.624>
- GREEN, R. 2012. Everyday ethics: shortcomings in locum practice procedures. *In Practice*, 34, 110-111. <https://doi.org/10.1136/inp.e71>
- GREEN, R. 2014. Everyday ethics: Follow-up fiasco. *In Practice*, 36, 374. <https://doi.org/10.1136/inp.g4255>
- GREY-BRUCE VETERINARY ASSOCIATION & ROLLIN, B. E. 2007. Veterinary Medical Ethics Ethical Question of the Month January 2007. *The Canadian Veterinary Journal*, 48, 17-18. PMC1716747
- HACKMAN, N. 2004. A Question of Conscience: Assistants and Anaesthesia. *Veterinary Technician*, 25, 714-715.
- HACKMAN, N. 2005. A question of conscience - Client needs versus practice profits. *Veterinary Technician*, 26, 806. WOS:000233471400013.
- HARPER, M. & ROLLIN, B. E. 2017. Veterinary Medical Ethics - Ethical Question of the Month December 2017. *The Canadian Veterinary Journal = La revue veterinaire canadienne*, 58, 1253-1255. 29203934
- HASLAM, S. 2006. Everyday ethics: In the owner's interests. *In Practice*, 28, 159-159. <https://doi.org/10.1136/inpract.28.3.159>
- HASLAM, S. 2008. Everyday ethics: who owns a stray dog? *In Practice*, 30, 529. <https://doi.org/10.1136/inpract.30.9.529>
- HELE, E. 2018. Everyday ethics: Pleural effusion in a geriatric cat. *In Practice*, 40, 310. <https://doi.org/10.1136/inp.k3650>
- HENDERSON, K. 2013. Everyday ethics: Confronting bad husbandry. *In Practice*, 35, 486. <https://doi.org/10.1136/inp.f4716>
- HENDERSON, K. 2019. Disclosing pre-existing veterinary conditions to insurance companies. *In Practice*, 41, 46-47. <https://doi.org/10.1136/inp.l125>
- HERBERT, R. & ROLLIN, B. E. 2005. Veterinary Medical Ethics Ethical Question of the Month September 2005. *The Canadian Veterinary Journal*, 46, 1081-1082. PMC3085390
- HOLLOWAYCHUK, M. & ROLLIN, B. E. 2008. Veterinary Medical Ethics Ethical Question of the Month May 2008. *The Canadian Veterinary Journal*, 49, 439-440. PMC2359487
- HUNTLEY, E. 2019. When your duty of care extends beyond the patient to the client. *In Practice*, 41, 517. <https://doi.org/10.1136/inp.l6475>
- INGWERSEN, W. & ROLLIN, B. E. 1999. Veterinary Medical Ethics. *The Canadian Veterinary Journal*, 40, 846-847. PMC1539874
- JOSEPHSON, G. & ROLLIN, B. E. 1995. An ethicist's commentary on the case of a veterinarian with a client who has illicitly imported boar semen. *The Canadian Veterinary Journal = La revue veterinaire canadienne*, 36, 674-674. 8590422
- KEELER, K. & ROLLIN, B. E. 1994. An ethicist's commentary on the found dog cases. *The Canadian Veterinary Journal = La revue veterinaire canadienne*, 35, 537-537. 7994716
- KERR, A. 2008. Everyday ethics: pregnant downer cow. *In Practice*, 30, 117 <https://doi.org/10.1136/inpract.30.2.117>
- KERR, A. 2009. Everyday ethics: injured fawn. *In Practice*, 31, 470-471. <https://doi.org/10.1136/inpract.31.9.470>

- KERR, A. 2009. Everyday ethics: Suspected Organised Dog Fight. *In Practice*, 31, 198.  
<https://doi.org/10.1136/inpract.31.4.198>
- KLUMPP L, B. R. 2010. Chimpanzee scenario. *Australian Veterinary Journal*, 88, N14-15.
- KNIGHT, A. 2014. Everyday ethics: Dealing with dark desires. *In Practice*, 36, 54. <https://doi.org/10.1136/inp.g375>
- KNIGHT, A. 2016. Everyday ethics: A request for euthanasia: advising a colleague. *In Practice*, 38, 469.  
<https://doi.org/10.1136/inp.i5051>
- KNIGHT, A. 2016. Everyday ethics: A request for euthanasia: handling the client. *In Practice*, 38, 358.  
<https://doi.org/10.1136/inp.i3672>
- KNIGHT, A. 2017. Everyday ethics: Advice requested via social media. *In Practice*, 39, 478.  
<https://doi.org/10.1136/inp.j5005>
- KWANTES, L. & ROLLIN, B. 1993. Veterinary medical ethics. *The Canadian Veterinary Journal = La revue veterinaire canadienne*, 34, 201-202. 17424197
- LANGLAIS, L. & ROLLIN, B. E. 2005. Veterinary Medical Ethics Ethical Question of the Month February 2005. *The Canadian Veterinary Journal*, 46, 395-395. PMC3085343
- LEE, J., WELSH, P. & WHITING, M. 2013. Professional and legal issues: surgical misadventure. *The Veterinary Nurse*, 4, 504-507. <https://doi.org/10.12968/vetn.2013.4.8.504>
- LEEB, C. 2007. Everyday ethics: a troubled vet abroad. *In Practice*, 29, 304-305.  
<https://doi.org/10.1136/inpract.29.5.304>
- LEM, M. & ROLLIN, B. E. 2012. Veterinary Medical Ethics Ethical Question of the Month June 2012. *The Canadian Veterinary Journal*, 53, 591-594. PMC3354817
- LEWIS, R. & ROLLIN, B. E. 2009. Veterinary Medical Ethics Ethical Question of the Month April 2009. *The Canadian Veterinary Journal*, 50, 345-349. PMC2657514
- LEWIS, R. & ROLLIN, B. E. 2009. Veterinary Medical Ethics Ethical Question of the Month May 2009. *The Canadian Veterinary Journal*, 50, 455-459. PMC2671867
- LEWIS, R. & ROLLIN, B. E. 2010. Veterinary Medical Ethics Ethical Question of the Month August 2010. *The Canadian Veterinary Journal*, 51, 807-810. PMC2904998
- LEWIS, R. & ROLLIN, B. E. 2011. Veterinary Medical Ethics Ethical Question of the Month July 2011. *The Canadian Veterinary Journal*, 52, 701-704. PMC3119234
- LEWIS, R. & ROLLIN, B. E. 2012. Veterinary Medical Ethics Ethical Question of the Month October 2012. *The Canadian Veterinary Journal*, 53, 1031-1034. PMC3447306
- LEWIS, R. & ROLLIN, B. E. 2018. Veterinary Medical Ethics - Ethical Question of the Month June 2018. *The Canadian Veterinary Journal = La revue veterinaire canadienne*, 59, 577-579. 29910472
- LEWIS, R. & ROLLIN, B. E. 2018. Veterinary Medical Ethics - Ethical Question of the Month May 2018. *The Canadian Veterinary Journal = La revue veterinaire canadienne*, 59, 465-466. 29904199
- LULAI, C. & ROLLIN, B. E. 2003. An ethicist's commentary on the elastrator for older bulls. *The Canadian veterinary journal = La revue veterinaire canadienne*, 44, 624-624. 13677594
- MAASTRICHT, S. 2010. Ethical dilemma - Sheba. *Australian Veterinary Journal*, 88, N22-3.



- MACDONALD, J. 2011. Who needs key skills? Part 2. *Veterinary Nursing Journal*, 26, 18-20.  
<https://doi.org/10.1111/j.2045-0648.2010.00006.x>
- MACLEOD, A. & ROLLIN, B. E. 2013. Veterinary Medical Ethics Ethical Question of the Month August 2013. *The Canadian Veterinary Journal*, 54, 725-727. PMC3711157
- MAGALHÃES-SANT'ANA, M. 2016. Everyday ethics: Refusing to take part in euthanasia. *In Practice*, 38, 253.  
<https://doi.org/10.1136/inp.i1959>
- MAGALHÃES-SANT'ANA, M. 2017. Everyday ethics: Resisting the urge to prescribe vancomycin. *In Practice*, 39, 294. <https://doi.org/10.1136/inp.j2410>
- MAGALHÃES-SANT'ANA, M. 2020. Sedating a horse for the purpose of film production. *In Practice*, 42, 245.  
<https://doi.org/10.1136/inp.m1493>
- MAGALHÃES-SANT'ANA, M.; HANLON, A.J. Straight from the horse's mouth: Using vignettes to support student learning in veterinary ethics. *Journal of Veterinary Medical Education* 2016, 43, 321-330.  
<https://doi.org/10.3138/jvme.0815-137R1>
- MAGALHÃES-SANT'ANA, M., MORE, S. J., MORTON, D. B. & HANLON, A. 2016. Ethical challenges facing veterinary professionals in Ireland: results from Policy Delphi with vignette methodology. *Vet Rec*, 179, 437.  
<https://doi.org/10.1136/vr.103786>
- MAGALHÃES, S., ANA, M., PELETEIRO, M. C. & STILWELL, G. 2020. Establishing Animal Welfare Rules of Conduct for the Portuguese Veterinary Profession—Results from a Policy Delphi with Vignettes. *Animals*, 10.  
<https://doi.org/10.3390/ani10091596>
- MAIN, C. 2010. Everyday ethics: postoperative responsibility. *In Practice*, 32, 38-39.  
<https://doi.org/10.1136/inpract.32.1.38>
- MAIN, D. 2014. Everyday ethics: Financial incentives. *In Practice*, 36, 262. <https://doi.org/10.1136/inp.g2826>
- MALIK, A. 2020. Treating exotics when your colleague has limited expertise. *In Practice*, 42, 61.  
<https://doi.org/10.1136/inp.m124>
- MALIK, A. 2020. What should you do with an orphaned baby grey squirrel? *In Practice*, 42, 469.  
<https://doi.org/10.1136/inp.m3250>
- MCCAMUS, J. & ROLLIN, B. E. 2001. An ethicist's commentary on the case of a client with too many animals. *The Canadian Veterinary Journal = La revue veterinaire canadienne*, 42, 853-854. 11708202
- MCCAMUS, J. & ROLLIN, B. E. 2002. An ethicist's commentary on the elderly couple rescuing animals. *The Canadian Veterinary Journal*, 43, 327-328. PMC339249
- MCCULLOCH, S. 2011. Everyday ethics: financially strapped owner with a suffering cat. *In Practice*, 33, 297-298.  
<https://doi.org/10.1136/inp.d3465>
- MCCULLOCH, S. 2012. Everyday ethics: what if it was your dog? *In Practice*, 34, 494-495.  
<https://doi.org/10.1136/inp.e5530>
- MCCULLOCH, S. 2013. Everyday ethics: Is flirting with clients taboo? *In Practice*, 35, 222.  
<https://doi.org/10.1136/inp.f2034>
- MCCULLOCH, S. 2014. Everyday ethics: The case of the whelping bitch. *In Practice*, 36, 102.  
<https://doi.org/10.1136/inp.g145>
- MCKELVEY, D. D. & ROLLIN, B. E. 2006. Veterinary Medical Ethics Ethical Question of the Month July 2006. *The Canadian Veterinary Journal*, 47, 631-634. PMC1482447

- MCLELLAN, L. 2018. Everyday ethics: Slipped disc and dyspnoea in a French bulldog. *In Practice*, 40, 166. <https://doi.org/10.1136/inp.k1793>
- MCMURRAN, S. 2020. Administering an analgesic during electroejaculation procedures in rams. *In Practice*, 42, 421. <https://doi.org/10.1136/inp.m2645>
- MCNEIL, M. & ROLLIN, B. E. 2012. Veterinary Medical Ethics Ethical Question of the Month September 2012. *The Canadian Veterinary Journal*, 53, 919-922. PMC3418777
- MILLS, D. 2016. Everyday ethics: Too feral to save? *In Practice*, 38, 198. <https://doi.org/10.1136/inp.i1532>
- MILLS, D. 2016. Everyday ethics: Using the evidence. *In Practice*, 38, 310. <https://doi.org/10.1136/inp.i3023>
- MULLAN, S. 2006. Everyday ethics: Celebrity Downer Cow. *In Practice*, 28, 52. <https://doi.org/10.1136/inpract.28.1.52>
- MULLAN, S. 2006. Everyday ethics: Homeopathy, a moral stress? *In Practice*, 28, 422-422. <https://doi.org/10.1136/inpract.28.7.422>
- NEALE, M. 2007. Everyday ethics: organic farm with languishing lambs. *In Practice*, 29, 367-367. <https://doi.org/10.1136/inpract.29.6.367>
- NEALE, M. 2008. Everyday ethics: substandard stockmanship. *In Practice*, 30, 416. <http://dx.doi.org/10.1136/inpract.30.7.416>
- NEMETH, N. & ROLLIN, B. E. 2002. An ethicist's commentary on the mishandling of an injured animal by a raptor rehabilitation facility. *The Canadian Veterinary Journal = La revue veterinaire canadienne*, 43, 666-667. 12240524
- NORTH AMERICAN VETERINARY TECHNICIAN ASSOCIATION 2001. A question of conscience - Suspected abuse. *Veterinary Technician*, 22, 557, 561. WOS:000171715900013
- NORTH AMERICAN VETERINARY TECHNICIAN ASSOCIATION 2002. A question of conscience: Breeding grounds of trouble. *Veterinary Technician*, 23, 239-239. WOS:000175007300010
- NORTH AMERICAN VETERINARY TECHNICIAN ASSOCIATION 2003. A question of conscience. *Veterinary Technician*, 24, 492-493. WOS:000184418900029
- O'HALLORAN, J. & ROLLIN, B. E. 2017. Veterinary Medical Ethics - Ethical Question of the Month November 2017. *The Canadian Veterinary Journal = La revue veterinaire canadienne*, 58, 1149-1151. 29089650
- OLFERT, E. & ROLLIN, B. E. 1992. Veterinary medical ethics. *The Canadian Veterinary Journal = La revue veterinaire canadienne*, 33, 775-777. 17424129
- PETRENY, L. & ROLLIN, B. E. 2007. Veterinary Medical Ethics Ethical Question of the Month April 2007. *The Canadian Veterinary Journal*, 48, 345-348. PMC1831507
- PETRENY, L. & ROLLIN, B. E. 2008. Veterinary Medical Ethics Ethical Question of the Month March 2008. *The Canadian Veterinary Journal*, 49, 227-229. PMC2249713
- PHIPPS, B. & ROLLIN, B. 1993. Veterinary medical ethics. *The Canadian Veterinary Journal = La revue veterinaire canadienne*, 34, 586-587. 17424302
- PRITCHARD, J. 2006. Everyday ethics: to trial or not to trial. *In Practice*, 28, 359-360. <https://doi.org/10.1136/inpract.28.6.359>

- PRITCHARD, J. 2006. Everyday ethics: Trotter Struggling to Walk. *In Practice*, 28, 228-229. <https://doi.org/10.1136/inpract.28.4.228>
- RAMEY, D. & ROLLIN, B. E. 2014. Veterinary Medical Ethics Ethical Question of the Month June 2014. *The Canadian Veterinary Journal*, 55, 415-416. PMC3992301
- RAMSEY, W. B. & ROLLIN, B. E. 2000. An ethicist's commentary on whether a technician should administer preanesthesia without a veterinary examination. *The Canadian Veterinary Journal*, 41, 592-593. PMC1476242
- REES, G. 2014. Everyday ethics: Fate of a severely lame cow. *In Practice*, 36, 526. <https://doi.org/10.1136/inp.g6399>
- REES, G. 2015. Everyday ethics: Always tell the truth? *In Practice*, 37, 150. <https://doi.org/10.1136/inp.h971>
- REES, G. 2015. Everyday ethics: The mating game. *In Practice*, 37, 206. <https://doi.org/10.1136/inp.h1303>
- RICHARDS, I. 2013. Everyday ethics: Rodents and rights: patients or pet food? *In Practice*, 35, 158. <https://doi.org/10.1136/inp.f829>
- ROBERTS, A. 2020. Dealing with the owner who is reluctant to accept that their pet is obese. *In Practice*, 42, 533. <https://doi.org/10.1136/inp.m3865>
- ROBERTS, D. & ROLLIN, B. E. 2003. An ethicist's commentary on veterinarians treating unowned animals and euthanizing unwanted animals. *The Canadian Veterinary Journal = La revue veterinaire canadienne*, 44, 363-364. 12757128
- ROBINSON, R. A. & ROLLIN, B. E. 1996. An ethicist's commentary on the veterinarian receiving complaints from swine barn workers concerning respiratory problems. *The Canadian Veterinary Journal = La revue veterinaire canadienne*, 37, 262-263. 8705970
- ROBINSON, R. A. & ROLLIN, B. E. 1997. An ethicist's commentary on the case of the anorexic client who does not feed her dog. *The Canadian Veterinary Journal = La revue veterinaire canadienne*, 38, 263-263. 9167875
- ROGER, P. 2007. Everyday ethics: neuter or just treat? *In Practice*, 29, 55-55. <https://doi.org/10.1136/inpract.29.1.55>
- ROGER, P. 2009. Everyday ethics: bulldog caesarian. *In Practice*, 31, 95-95. <https://doi.org/10.1136/inpract.31.2.95>
- ROGER, P. 2009. Everyday ethics: research involving animals. *In Practice*, 31, 359-359. <https://doi.org/10.1136/inpract.31.7.359>
- ROGER, P. 2011. Everyday ethics: irresponsible dog ownership. *In Practice*, 33, 422-422. <https://doi.org/10.1136/inp.d4961>
- ROGER, P. 2012. Everyday ethics: promoting personal views in practice. *In Practice*, 34, 54-54. <https://doi.org/10.1136/inp.d7470>
- ROGER, P. 2014. Everyday ethics: A stitch in time. *In Practice*, 36, 310. <https://doi.org/10.1136/inp.g3485>
- ROGER, P. 2014. Everyday ethics: Little nippers. *In Practice*, 36, 430. <https://doi.org/10.1136/inp.g4915>
- ROGER, P. 2015. Everyday ethics: Value and treatment. *In Practice*, 37, 47. <https://doi.org/10.1136/inp.h114>
- ROLLIN, B. 1993. Veterinary medical ethics. *The Canadian Veterinary Journal = La revue veterinaire canadienne*, 34, 10-11. 17424140
- ROLLIN, B. 1993. Veterinary medical ethics. *The Canadian Veterinary Journal = La revue veterinaire canadienne*, 34, 136-137. 17424181

- ROLLIN, B. 1993. Veterinary medical ethics. *The Canadian Veterinary Journal = La revue veterinaire canadienne*, 34, 326-327. 17424234
- ROLLIN, B. 1993. Veterinary medical ethics. *The Canadian Veterinary Journal = La revue veterinaire canadienne*, 34, 388-389. 17424248
- ROLLIN, B. 1993. Veterinary medical ethics. *The Canadian Veterinary Journal = La revue veterinaire canadienne*, 34, 458-460. 17424265
- ROLLIN, B. 1993. Veterinary medical ethics. *The Canadian Veterinary Journal = La revue veterinaire canadienne*, 34, 646-647. 17424318
- ROLLIN, B. 1993. Veterinary medical ethics. *The Canadian Veterinary Journal = La revue veterinaire canadienne*, 34, 712-713. 17424335
- ROLLIN, B. 1998. An ethicist's commentary on the dog being used to carry drugs. *The Canadian Veterinary Journal = La revue veterinaire canadienne*, 39, 200-201. 9559211
- ROLLIN, B. 1998. Veterinary medical ethics. *The Canadian Veterinary Journal = La revue veterinaire canadienne*, 39, 136-137. 17424502
- ROLLIN, B. 2001. Veterinary medical ethics. *The Canadian Veterinary Journal = La revue veterinaire canadienne*, 42, 511-513. 17424631
- ROLLIN, B. 2014. Veterinary Medical Ethics Ethical Question of the Month April 2014. *The Canadian Veterinary Journal = La revue veterinaire canadienne*, 55, 306-307. 24688131
- ROLLIN, B. E. 1991. Veterinary medical ethics. *The Canadian Veterinary Journal = La revue veterinaire canadienne*, 32, 4-6. 17423721
- ROLLIN, B. E. 1991. Veterinary medical ethics. *The Canadian Veterinary Journal = La revue veterinaire canadienne*, 32, 68-69. 17423741
- ROLLIN, B. E. 1991. Veterinary medical ethics. *The Canadian Veterinary Journal = La revue veterinaire canadienne*, 32, 138-139. 17423751
- ROLLIN, B. E. 1991. Veterinary medical ethics. *The Canadian Veterinary Journal = La revue veterinaire canadienne*, 32, 202-203. 17423765
- ROLLIN, B. E. 1991. Veterinary medical ethics. *The Canadian Veterinary Journal = La revue veterinaire canadienne*, 32, 327-329. 17423798
- ROLLIN, B. E. 1991. Veterinary medical ethics. *The Canadian Veterinary Journal = La revue veterinaire canadienne*, 32, 456-457. 17423837
- ROLLIN, B. E. 1991. Veterinary medical ethics. *The Canadian Veterinary Journal = La revue veterinaire canadienne*, 32, 522-524. 17423856
- ROLLIN, B. E. 1991. Veterinary medical ethics. *The Canadian Veterinary Journal = La revue veterinaire canadienne*, 32, 584-585. 17423871
- ROLLIN, B. E. 1991. Veterinary medical ethics. *The Canadian Veterinary Journal = La revue veterinaire canadienne*, 32, 648-649. 17423893
- ROLLIN, B. E. 1991. Veterinary medical ethics. *The Canadian Veterinary Journal = La revue veterinaire canadienne*, 32, 714-715. 17423911

- ROLLIN, B. E. 1992. Veterinary medical ethics. *The Canadian Veterinary Journal = La revue veterinaire canadienne*, 33, 7-8. 17423936
- ROLLIN, B. E. 1992. Veterinary medical ethics. *The Canadian Veterinary Journal = La revue veterinaire canadienne*, 33, 84-85. 17423957
- ROLLIN, B. E. 1992. Veterinary medical ethics. *The Canadian Veterinary Journal = La revue veterinaire canadienne*, 33, 296-297. 17423997
- ROLLIN, B. E. 1992. Veterinary medical ethics. *The Canadian Veterinary Journal = La revue veterinaire canadienne*, 33, 358-359. 17424016
- ROLLIN, B. E. 1992. Veterinary medical ethics. *The Canadian Veterinary Journal = La revue veterinaire canadienne*, 33, 422-423. 17424034
- ROLLIN, B. E. 1994. An ethicists commentary on annual rabies vaccination. *The Canadian Veterinary Journal = La revue veterinaire canadienne*, 35, 72-73. 8069829
- ROLLIN, B. E. 1994. An ethicist's commentary on the case of a breeder perpetuating a line of dogs having seizures. *The Canadian Veterinary Journal = La revue veterinaire canadienne*, 35, 332-333. 8069834
- ROLLIN, B. E. 1994. An ethicist's commentary on the case of the dog with a persistent cough. *The Canadian Veterinary Journal = La revue veterinaire canadienne*, 35, 745-746. 9132285
- ROLLIN, B. E. 1994. An ethicist's commentary on the case of the ewes in distress. *The Canadian Veterinary Journal = La revue veterinaire canadienne*, 35, 679-679. 7866958
- ROLLIN, B. E. 1994. An ethicist's commentary on the case of the irresponsible veterinarian-breeder. *The Canadian Veterinary Journal = La revue veterinaire canadienne*, 35, 6-7. 8044765
- ROLLIN, B. E. 1994. An ethicist's commentary on the case of whether a biting dog should be adopted out or destroyed. *The Canadian Veterinary Journal = La revue veterinaire canadienne*, 35, 598-598. 7994701
- ROLLIN, B. E. 1994. An ethicist's commentary on the government swine disease policy. *The Canadian Veterinary Journal = La revue veterinaire canadienne*, 35, 136-137. 8055425
- ROLLIN, B. E. 1995. An ethicist's commentary on the case of a client who refuses euthanasia for a sick cat. *The Canadian Veterinary Journal = La revue veterinaire canadienne*, 36, 471-472. 7585430
- ROLLIN, B. E. 1995. An ethicist's commentary on the case of the female veterinarian receiving unwelcome attention from her employer. *The Canadian Veterinary Journal = La revue veterinaire canadienne*, 36, 353-353. 7648538
- ROLLIN, B. E. 1995. An ethicist's commentary on the case of the recent graduate who is offended by conversations between employers. *The Canadian Veterinary Journal = La revue veterinaire canadienne*, 36, 410-411. 7585416
- ROLLIN, B. E. 1995. An ethicist's commentary on the misdiagnosed radiograph of a racing thoroughbred. *The Canadian Veterinary Journal = La revue veterinaire canadienne*, 36, 739-741. 8748442
- ROLLIN, B. E. 1995. An ethicist's commentary on whether a veterinarian should inform a client that a previous practitioner had left a sponge in a dog. *The Canadian Veterinary Journal = La revue veterinaire canadienne*, 36, 599-600. 8640632
- ROLLIN, B. E. 1995. An ethicist's commentary on whether rabies vaccine for livestock should be sold over the counter. *The Canadian Veterinary Journal = La revue veterinaire canadienne*, 36, 178-178. 7757926

- ROLLIN, B. E. 1995. An ethicist's commentary on whether veterinarians employed by large corporate entities can practise ethically. *The Canadian Veterinary Journal = La revue veterinaire canadienne*, 36, 74-75. 7728733
- ROLLIN, B. E. 1995. An ethicist's commentary on whether veterinarians should prescribe medications that are neither therapeutic nor prophylactic to increase productivity. *The Canadian Veterinary Journal = La revue veterinaire canadienne*, 36, 535-536. 7497423
- ROLLIN, B. E. 1995. Veterinary Medical Ethics. *The Canadian Veterinary Journal*, 36, 268-270. PMC1686897
- ROLLIN, B. E. 1996. An ethicist's commentary on how the veterinarian should deal with an injured, unowned dog. *The Canadian Veterinary Journal = La revue veterinaire canadienne*, 37, 74-76. 8640654
- ROLLIN, B. E. 1996. An ethicist's commentary on the case of a veterinarian who suspects an emergency clinician was negligent in treating a trauma case. *The Canadian Veterinary Journal = La revue veterinaire canadienne*, 37, 201-202. 8801014
- ROLLIN, B. E. 1996. An ethicist's commentary on the case of the veterinarian failing to prescribe prescription drugs and losing practice income. *The Canadian Veterinary Journal = La revue veterinaire canadienne*, 37, 330-331. 8689592
- ROLLIN, B. E. 1996. An ethicist's commentary on the case of the veterinarian who euthanized an animal thinking that he had received owner permission. *The Canadian Veterinary Journal = La revue veterinaire canadienne*, 37, 519-520. 8877037
- ROLLIN, B. E. 1996. An ethicist's commentary on the case of the veterinarian who suspects a local cattery of being a source of feline infectious peritonitis. *The Canadian Veterinary Journal = La revue veterinaire canadienne*, 37, 7-8. 8746413
- ROLLIN, B. E. 1996. An ethicist's commentary on the case of the veterinarian who will not utilize the proper regimen for control of roundworms. *The Canadian Veterinary Journal = La revue veterinaire canadienne*, 37, 585-586. 8896873
- ROLLIN, B. E. 1996. An ethicist's commentary on the case of whether a veterinarian prescribing and selling drugs is in a conflict of interest situation. *The Canadian Veterinary Journal = La revue veterinaire canadienne*, 37, 713-714. 9111690
- ROLLIN, B. E. 1996. An ethicist's commentary on whether a veterinarian should write a prescription of a branded drug in return for a financial incentive. *The Canadian Veterinary Journal = La revue veterinaire canadienne*, 37, 149-149. 8681280
- ROLLIN, B. E. 1997. An ethicist's commentary on the case of suspected poisoning. *The Canadian Veterinary Journal = La revue veterinaire canadienne*, 38, 6-7. 8993779
- ROLLIN, B. E. 1997. An ethicist's commentary on the case of the farmer advised by "experts". *The Canadian Veterinary Journal = La revue veterinaire canadienne*, 38, 745-746. 9426940
- ROLLIN, B. E. 1997. An ethicist's commentary on the mismanaged cesarean section. *The Canadian Veterinary Journal = La revue veterinaire canadienne*, 38, 682-682. 9360787
- ROLLIN, B. E. 1997. Veterinary Medical Ethics. *The Canadian Veterinary Journal*, 38, 407-407. PMC1576736
- ROLLIN, B. E. 1998. An ethicist's commentary on the case of the elderly client seeking "unnecessary" medical advice. *The Canadian Veterinary Journal = La revue veterinaire canadienne*, 39, 264-265. 9592614
- ROLLIN, B. E. 1998. Veterinary Medical Ethics. *The Canadian Veterinary Journal*, 39, 399-400. PMC1539532
- ROLLIN, B. E. 1998. Veterinary Medical Ethics. *The Canadian Veterinary Journal*, 39, 465-466. PMC1539418

ROLLIN, B. E. 1998. Veterinary Medical Ethics. *The Canadian Veterinary Journal*, 39, 530-531. PMC1539424

ROLLIN, B. E. 1998. Veterinary Medical Ethics. *The Canadian Veterinary Journal*, 39, 676-677. PMC1539470

ROLLIN, B. E. 1999. Veterinary Medical Ethics. *The Canadian Veterinary Journal*, 40, 9-10. PMC1539640

ROLLIN, B. E. 1999. Veterinary Medical Ethics. *The Canadian Veterinary Journal*, 40, 95-96. PMC1539556

ROLLIN, B. E. 1999. Veterinary Medical Ethics. *The Canadian Veterinary Journal*, 40, 153-154. PMC1539672

ROLLIN, B. E. 1999. Veterinary Medical Ethics. *The Canadian Veterinary Journal*, 40, 222-223. PMC1539703

ROLLIN, B. E. 1999. Veterinary Medical Ethics. *The Canadian Veterinary Journal*, 40, 298-299. PMC1539793

ROLLIN, B. E. 1999. Veterinary Medical Ethics. *The Canadian Veterinary Journal*, 40, 383-384. PMC1539727

ROLLIN, B. E. 1999. Veterinary Medical Ethics. *The Canadian Veterinary Journal*, 40, 458-459. PMC1539745

ROLLIN, B. E. 1999. Veterinary Medical Ethics. *The Canadian Veterinary Journal*, 40, 535-536. PMC1539772

ROLLIN, B. E. 1999. Veterinary Medical Ethics. *The Canadian Veterinary Journal*, 40, 616-617. PMC1539858

ROLLIN, B. E. 1999. Veterinary Medical Ethics. *The Canadian Veterinary Journal*, 40, 760-761. PMC1539988

ROLLIN, B. E. 2000. An ethicist's commentary on how to decide whether a given practice is unethical. *The Canadian Veterinary Journal*, 41, 172-173. PMC1476324

ROLLIN, B. E. 2000. An ethicist's commentary on rabies vaccinations of raccoons. *The Canadian Veterinary Journal*, 41, 270-271. PMC1476160

ROLLIN, B. E. 2000. An ethicist's commentary on research protocols requiring significant animal suffering. *The Canadian Veterinary Journal*, 41, 748-748. PMC1476366

ROLLIN, B. E. 2000. An ethicist's commentary on the case of a proposed farm tour while cattle are infected with Salmonella. *The Canadian Veterinary Journal*, 41, 6-6. PMC1476338

ROLLIN, B. E. 2000. An ethicist's commentary on the ethics of painless killing. *The Canadian Veterinary Journal = La revue veterinaire canadienne*, 41, 662-663. 10992984

ROLLIN, B. E. 2000. Veterinary Medical Ethics. *The Canadian Veterinary Journal*, 41, 90-91. PMC1476276

ROLLIN, B. E. 2001. An ethicist's commentary on animal welfare versus food safety in collecting antler velvet. *The Canadian Veterinary Journal*, 42, 330-331. PMC1476509

ROLLIN, B. E. 2001. An ethicist's commentary on giving an analgesic to mask pain in a horse. *The Canadian Veterinary Journal = La revue veterinaire canadienne*, 42, 420-421. 11424574

ROLLIN, B. E. 2001. An ethicist's commentary on shooting farmed deer. *The Canadian Veterinary Journal*, 42, 598-598. PMC1476561

ROLLIN, B. E. 2001. An ethicist's commentary on the case of a client trying to ship a downer animal. *The Canadian Veterinary Journal*, 42, 760-761. PMC1476581

ROLLIN, B. E. 2001. An ethicist's commentary on the ethics of killing healthy animals. *The Canadian Veterinary Journal = La revue veterinaire canadienne*, 42, 908-908. 11769616

ROLLIN, B. E. 2001. An ethicist's commentary on the producer who is unwilling to euthanize sick pigs. *The Canadian Veterinary Journal*, 42, 8-8. PMC1476417

- ROLLIN, B. E. 2001. An ethicist's commentary on the swine infected with antimicrobial-resistant Salmonella. *The Canadian Veterinary Journal*, 42, 88-89. PMC1476492
- ROLLIN, B. E. 2001. An ethicist's commentary on whether animals raised in confinement are thus happy in confinement. *The Canadian Veterinary Journal = La revue veterinaire canadienne*, 42, 676-676. 11565368
- ROLLIN, B. E. 2001. Veterinary medical ethics. *The Canadian Veterinary Journal = La revue veterinaire canadienne*, 42, 169-171. 17424617
- ROLLIN, B. E. 2002. An ethicist's commentary on animal rights versus welfare. *The Canadian Veterinary Journal = La revue veterinaire canadienne*, 43, 913-913. 12561686
- ROLLIN, B. E. 2002. An ethicist's commentary on equating productivity and welfare. *The Canadian Veterinary Journal*, 43, 83-83. PMC339160
- ROLLIN, B. E. 2002. An ethicist's commentary on extra-label drug use. *The Canadian Veterinary Journal = La revue veterinaire canadienne*, 43, 749-750. 12395756
- ROLLIN, B. E. 2002. An ethicist's commentary on guarding against conflict of interest. *The Canadian Veterinary Journal*, 43, 249-250. PMC339219
- ROLLIN, B. E. 2002. An ethicist's commentary on technicians performing management procedures on farm without on-site supervision. *The Canadian Veterinary Journal = La revue veterinaire canadienne*, 43, 583-584. 12170833
- ROLLIN, B. E. 2002. An ethicist's commentary on the case of the client requesting anaesthesia medication. *The Canadian Veterinary Journal*, 43, 827-827. PMC339745
- ROLLIN, B. E. 2002. An ethicist's commentary on the case of the company offering a rebate if the veterinarian changes vaccines. *The Canadian Veterinary Journal*, 43, 411-411. PMC339285
- ROLLIN, B. E. 2002. An ethicist's commentary on the mishandling of an injured animal by a raptor rehabilitation facility. *The Canadian Veterinary Journal*, 43, 666-667. PMC339533
- ROLLIN, B. E. 2002. An ethicist's commentary on veterinarians producing autogenous vaccines and compounding antimicrobial drugs. *The Canadian Veterinary Journal*, 43, 164-164. PMC339184
- ROLLIN, B. E. 2003. An ethicist's commentary on a client publishing your anthelmintic regimen without permission. *The Canadian Veterinary Journal*, 44, 276-276. PMC372232
- ROLLIN, B. E. 2003. An ethicist's commentary on funding animals for continuing education. *The Canadian Veterinary Journal = La revue veterinaire canadienne*, 44, 867-868. 14664350
- ROLLIN, B. E. 2003. An ethicist's commentary on sharing new prevention and treatment regimens. *The Canadian Veterinary Journal*, 44, 11-12. PMC340002
- ROLLIN, B. E. 2003. An ethicist's commentary on the case of the client seeking antibiotic in feed. *The Canadian Veterinary Journal*, 44, 703-703. PMC340254
- ROLLIN, B. E. 2003. An ethicist's commentary on veterinary "Nurse Practitioners". *The Canadian Veterinary Journal*, 44, 107-109. PMC340033
- ROLLIN, B. E. 2003. An ethicist's commentary on when a veterinarian can render medical assistance to people. *The Canadian Veterinary Journal*, 44, 189-191. PMC340065
- ROLLIN, B. E. 2003. An ethicist's commentary on whether veterinarians should support activist groups. *The Canadian Veterinary Journal = La revue veterinaire canadienne*, 44, 955-955. 14703081



- ROLLIN, B. E. 2004. An ethicist's commentary on good versus natural death. *The Canadian Veterinary Journal = La revue veterinaire canadienne*, 45, 806-806. 15532880
- ROLLIN, B. E. 2004. An ethicist's commentary on pigs who eat rodenticide. *The Canadian Veterinary Journal = La revue veterinaire canadienne*, 45, 643-644. 15368738
- ROLLIN, B. E. 2004. An ethicist's commentary on placing animals in less-than perfect homes. *The Canadian Veterinary Journal = La revue veterinaire canadienne*, 45, 291-292. 15144101
- ROLLIN, B. E. 2004. An ethicist's commentary on the case of a client who demands treatment by a specific veterinarian. *The Canadian Veterinary Journal = La revue veterinaire canadienne*, 45, 727-727. 15510682
- ROLLIN, B. E. 2004. An ethicist's commentary on using wood chippers to kill chickens. *The Canadian Veterinary Journal = La revue veterinaire canadienne*, 45, 9-9. 14992250
- ROLLIN, B. E. 2004. An ethicist's commentary on whether it is wrong to modify animals to fit our production systems. *The Canadian Veterinary Journal = La revue veterinaire canadienne*, 45, 899-899. 15600155
- ROLLIN, B. E. 2004. Veterinary Medical Ethics Ethical Question of the Month December 2003. *The Canadian Veterinary Journal*, 45, 195-196. PMC3085442
- ROLLIN, B. E. 2004. Veterinary Medical Ethics Ethical Question of the Month February 2004. *The Canadian Veterinary Journal*, 45, 379-379. PMC3085444
- ROLLIN, B. E. 2004. Veterinary Medical Ethics Ethical Question of the Month March 2004. *The Canadian Veterinary Journal*, 45, 457-457. PMC3085445
- ROLLIN, B. E. 2004. Veterinary Medical Ethics Ethical Question of the Month November 2003. *The Canadian Veterinary Journal*, 45, 97-97. PMC3085441
- ROLLIN, B. E. 2004. Veterinary Medical Ethics Ethical Question of the Month September 2004. *The Canadian Veterinary Journal*, 45, 975-975. PMC2751722
- ROLLIN, B. E. 2005. Ethical Question of the Month November 2004. *The Canadian Veterinary Journal*, 46, 111-112. PMC3085336
- ROLLIN, B. E. 2005. Veterinary Medical Ethics Ethical Question of the Month April 2005. *The Canadian Veterinary Journal*, 46, 579-579. PMC3085385
- ROLLIN, B. E. 2005. Veterinary Medical Ethics Ethical Question of the Month August 2005. *The Canadian Veterinary Journal*, 46, 978-978.
- ROLLIN, B. E. 2005. Veterinary Medical Ethics Ethical Question of the Month December 2004. *The Canadian Veterinary Journal = La revue veterinaire canadienne*, 46, 203-204. 15884644
- ROLLIN, B. E. 2005. Veterinary Medical Ethics Ethical Question of the Month July 2005. *The Canadian Veterinary Journal*, 46, 867-868. PMC3085389
- ROLLIN, B. E. 2005. Veterinary Medical Ethics Ethical Question of the Month May 2005. *The Canadian Veterinary Journal*, 46, 683-684. PMC3085387
- ROLLIN, B. E. 2005. Veterinary Medical Ethics Ethical Question of the Month June 2005. *The Canadian Veterinary Journal*, 46, 771-771. PMC3085388
- ROLLIN, B. E. 2006. Ethical Question of the Month October 2005. *The Canadian Veterinary Journal*, 47, 17-17. PMC3081226

- ROLLIN, B. E. 2006. Veterinary Medical Ethics Ethical Question of the Month August 2006. *The Canadian Veterinary Journal*, 47, 741-742. PMC1524831
- ROLLIN, B. E. 2006. Veterinary Medical Ethics Ethical Question of the Month December 2006. *The Canadian Veterinary Journal*, 47, 1157-1158. PMC1636594
- ROLLIN, B. E. 2006. Veterinary Medical Ethics Ethical Question of the Month June 2006. *The Canadian Veterinary Journal*, 47, 518-520. PMC3093194
- ROLLIN, B. E. 2006. Veterinary Medical Ethics Ethical Question of the Month March 2006. *The Canadian Veterinary Journal*, 47, 200-200. PMC3086693
- ROLLIN, B. E. 2006. Veterinary Medical Ethics Ethical Question of the Month May 2006. *The Canadian Veterinary Journal*, 47, 416-418. PMC3086774
- ROLLIN, B. E. 2006. Veterinary Medical Ethics Ethical Question of the Month November 2006. *The Canadian Veterinary Journal*, 47, 1059-1062. PMC1624924
- ROLLIN, B. E. 2006. Veterinary Medical Ethics Ethical Question of the Month October 2006. *The Canadian Veterinary Journal*, 47, 961-963. PMC1571134
- ROLLIN, B. E. 2007. Veterinary Medical Ethics Ethical Question of the Month December 2007. *The Canadian Veterinary Journal*, 48, 1221-1222. PMC2081986
- ROLLIN, B. E. 2007. Veterinary Medical Ethics Ethical Question of the Month February 2007. *The Canadian Veterinary Journal*, 48, 125-126. PMC1780227
- ROLLIN, B. E. 2007. Veterinary Medical Ethics Ethical Question of the Month March 2007. *The Canadian Veterinary Journal*, 48, 239-241. PMC1800952
- ROLLIN, B. E. 2007. Veterinary Medical Ethics Ethical Question of the Month November 2007. *The Canadian Veterinary Journal*, 48, 1113-1114. PMC2034418
- ROLLIN, B. E. 2007. Veterinary Medical Ethics Ethical Question of the Month October 2007. *The Canadian Veterinary Journal*, 48, 1007-1008. PMC1978287
- ROLLIN, B. E. 2008. Veterinary Medical Ethics Ethical Question of the Month April 2008. *The Canadian Veterinary Journal*, 49, 335-336. PMC2275335
- ROLLIN, B. E. 2008. Veterinary Medical Ethics Ethical Question of the Month August 2008. *The Canadian Veterinary Journal*, 49, 749-752. PMC2465780
- ROLLIN, B. E. 2008. Veterinary Medical Ethics Ethical Question of the Month December 2008. *The Canadian Veterinary Journal*, 49, 1167-1170. PMC2583411
- ROLLIN, B. E. 2008. Veterinary Medical Ethics Ethical Question of the Month February 2008. *The Canadian Veterinary Journal*, 49, 117-120. PMC2216440
- ROLLIN, B. E. 2008. Veterinary Medical Ethics Ethical Question of the Month July 2008. *The Canadian Veterinary Journal*, 49, 633-634. PMC2430394
- ROLLIN, B. E. 2008. Veterinary Medical Ethics Ethical Question of the Month June 2008. *The Canadian Veterinary Journal*, 49, 535-538. PMC2387256
- ROLLIN, B. E. 2008. Veterinary Medical Ethics Ethical Question of the Month October 2008. *The Canadian Veterinary Journal*, 49, 955-957. PMC2553509

- ROLLIN, B. E. 2009. Veterinary Medical Ethics Ethical Question of the Month August 2009. *The Canadian Veterinary Journal*, 50, 801-803. PMC2711464
- ROLLIN, B. E. 2009. Veterinary Medical Ethics Ethical Question of the Month December 2009. *The Canadian Veterinary Journal*, 50, 1225-1226. PMC2777285
- ROLLIN, B. E. 2009. Veterinary Medical Ethics Ethical Question of the Month February 2009. *The Canadian Veterinary Journal*, 50, 131-132. PMC2629416
- ROLLIN, B. E. 2009. Veterinary Medical Ethics Ethical Question of the Month January 2009. *The Canadian Veterinary Journal*, 50, 13-16. PMC2603649
- ROLLIN, B. E. 2009. Veterinary Medical Ethics Ethical Question of the Month July 2009. *The Canadian Veterinary Journal*, 50, 693-696. PMC2696699
- ROLLIN, B. E. 2009. Veterinary Medical Ethics Ethical Question of the Month June 2009. *The Canadian Veterinary Journal*, 50, 569-570. PMC2684044
- ROLLIN, B. E. 2009. Veterinary Medical Ethics Ethical Question of the Month March 2009. *The Canadian Veterinary Journal*, 50, 229-231. PMC2643445
- ROLLIN, B. E. 2009. Veterinary Medical Ethics Ethical Question of the Month November 2009. *The Canadian Veterinary Journal*, 50, 1127-1132. PMC2764512
- ROLLIN, B. E. 2009. Veterinary Medical Ethics Ethical Question of the Month October 2009. *The Canadian Veterinary Journal*, 50, 1013-1016. PMC2748282
- ROLLIN, B. E. 2009. Veterinary Medical Ethics Ethical Question of the Month September 2009. *The Canadian Veterinary Journal*, 50, 901-904. PMC2726016
- ROLLIN, B. E. 2010. Veterinary Medical Ethics Ethical Question of the Month April 2010. *The Canadian Veterinary Journal*, 51, 351-353. PMC2839820
- ROLLIN, B. E. 2010. Veterinary Medical Ethics Ethical Question of the Month December 2010. *The Canadian Veterinary Journal*, 51, 1321-1324. PMC2978983
- ROLLIN, B. E. 2010. Veterinary Medical Ethics Ethical Question of the Month February 2010. *The Canadian Veterinary Journal*, 51, 131-132. PMC2808278
- ROLLIN, B. E. 2010. Veterinary Medical Ethics Ethical Question of the Month January 2010. *The Canadian Veterinary Journal*, 51, 27-30. PMC2797346
- ROLLIN, B. E. 2010. Veterinary Medical Ethics Ethical Question of the Month July 2010. *The Canadian Veterinary Journal*, 51, 685-688. PMC2885110
- ROLLIN, B. E. 2010. Veterinary Medical Ethics Ethical Question of the Month June 2010. *The Canadian Veterinary Journal*, 51, 569-572. PMC2871350
- ROLLIN, B. E. 2010. Veterinary Medical Ethics Ethical Question of the Month March 2010. *The Canadian Veterinary Journal*, 51, 237-238. PMC2822367
- ROLLIN, B. E. 2010. Veterinary Medical Ethics Ethical Question of the Month May 2010. *The Canadian Veterinary Journal*, 51, 447-451. PMC2857421
- ROLLIN, B. E. 2010. Veterinary Medical Ethics Ethical Question of the Month November 2010. *The Canadian Veterinary Journal*, 51, 1195-1198. PMC2957026

- ROLLIN, B. E. 2010. Veterinary Medical Ethics Ethical Question of the Month October 2010. *The Canadian Veterinary Journal*, 51, 1067-1070. PMC2942044
- ROLLIN, B. E. 2011. Veterinary Medical Ethics Ethical Issue of the Month January 2011. *The Canadian Veterinary Journal*, 52, 13-16. PMC3003570
- ROLLIN, B. E. 2011. Veterinary Medical Ethics Ethical Question of the Month April 2011. *The Canadian Veterinary Journal*, 52, 353-356. PMC3058646
- ROLLIN, B. E. 2011. Veterinary Medical Ethics Ethical Question of the Month August 2011. *The Canadian Veterinary Journal*, 52, 823-826. PMC3135025
- ROLLIN, B. E. 2011. Veterinary Medical Ethics Ethical Question of the Month December 2011. *The Canadian Veterinary Journal*, 52, 1283-1284. PMC3215459
- ROLLIN, B. E. 2011. Veterinary Medical Ethics Ethical Question of the Month February 2011. *The Canadian Veterinary Journal*, 52, 113-114. PMC3022446
- ROLLIN, B. E. 2011. Veterinary Medical Ethics Ethical Question of the Month June 2011. *The Canadian Veterinary Journal*, 52, 583-586. PMC3095155
- ROLLIN, B. E. 2011. Veterinary Medical Ethics Ethical Question of the Month March 2011. *The Canadian Veterinary Journal*, 52, 227-230. PMC3039893
- ROLLIN, B. E. 2011. Veterinary Medical Ethics Ethical Question of the Month May 2011. *The Canadian Veterinary Journal*, 52, 463-464. PMC3077996
- ROLLIN, B. E. 2011. Veterinary Medical Ethics Ethical Question of the Month November 2011. *The Canadian Veterinary Journal*, 52, 1169-1172. PMC3196009
- ROLLIN, B. E. 2011. Veterinary Medical Ethics Ethical Question of the Month September 2011. *The Canadian Veterinary Journal*, 52, 927-928. PMC3157066
- ROLLIN, B. E. 2012. Veterinary Medical Ethics Ethical Question of the Month April 2012. *The Canadian Veterinary Journal*, 53, 345-346. PMC3299502
- ROLLIN, B. E. 2012. Veterinary Medical Ethics Ethical Question of the Month August 2012. *The Canadian Veterinary Journal*, 53, 823-826. PMC3398517
- ROLLIN, B. E. 2012. Veterinary Medical Ethics Ethical Question of the Month December 2012. *The Canadian Veterinary Journal*, 53, 1245-1246. PMC3500113
- ROLLIN, B. E. 2012. Veterinary Medical Ethics Ethical Question of the Month February 2012. *The Canadian Veterinary Journal*, 53, 119-120. PMC3258824
- ROLLIN, B. E. 2012. Veterinary Medical Ethics Ethical Question of the Month January 2012. *The Canadian Veterinary Journal*, 53, 17-18. PMC3239144
- ROLLIN, B. E. 2012. Veterinary Medical Ethics Ethical Question of the Month March 2012. *The Canadian Veterinary Journal*, 53, 223-224. PMC3280774
- ROLLIN, B. E. 2012. Veterinary Medical Ethics Ethical Question of the Month November 2012. *The Canadian Veterinary Journal*, 53, 1153-1155. PMC3474570
- ROLLIN, B. E. 2013. Veterinary Medical Ethics Ethical Question of the Month April 2013. *The Canadian Veterinary Journal*, 54, 321-322. PMC3595932

- ROLLIN, B. E. 2013. Veterinary Medical Ethics Ethical Question of the Month December 2013. *The Canadian Veterinary Journal*, 54, 1111-1112. PMC3831381
- ROLLIN, B. E. 2013. Veterinary Medical Ethics Ethical Question of the Month February 2013. *The Canadian Veterinary Journal*, 54, 115-116. PMC3552584
- ROLLIN, B. E. 2013. Veterinary Medical Ethics Ethical Question of the Month January 2013. *The Canadian Veterinary Journal*, 54, 17-19. PMC3524808
- ROLLIN, B. E. 2013. Veterinary Medical Ethics Ethical Question of the Month July 2013. *The Canadian Veterinary Journal*, 54, 629-631. PMC3684995
- ROLLIN, B. E. 2013. Veterinary Medical Ethics Ethical Question of the Month June 2013. *The Canadian Veterinary Journal*, 54, 531-532. PMC3659444
- ROLLIN, B. E. 2013. Veterinary Medical Ethics Ethical Question of the Month March 2013. *The Canadian Veterinary Journal*, 54, 213-214. PMC3573625
- ROLLIN, B. E. 2013. Veterinary Medical Ethics Ethical Question of the Month May 2013. *The Canadian Veterinary Journal*, 54, 429-430. PMC3624909
- ROLLIN, B. E. 2013. Veterinary Medical Ethics Ethical Question of the Month November 2013. *The Canadian Veterinary Journal*, 54, 1015-1018. PMC3801277
- ROLLIN, B. E. 2013. Veterinary Medical Ethics Ethical Question of the Month October 2013. *The Canadian Veterinary Journal*, 54, 921-922. PMC3781422
- ROLLIN, B. E. 2013. Veterinary Medical Ethics Ethical Question of the Month September 2013. *The Canadian Veterinary Journal*, 54, 817-820. PMC3743564
- ROLLIN, B. E. 2014. Veterinary Medical Ethics - Ethical Question of the Month May 2014. *The Canadian Veterinary Journal = La revue veterinaire canadienne*, 55, 415-416. 24790227
- ROLLIN, B. E. 2014. Veterinary Medical Ethics Ethical question of the month — December 2014. *The Canadian Veterinary Journal*, 55, 1127-1129. PMC4231798
- ROLLIN, B. E. 2014. Veterinary Medical Ethics Ethical question of the month — October 2014. *The Canadian Veterinary Journal*, 55, 917-919. PMC4187372
- ROLLIN, B. E. 2014. Veterinary Medical Ethics Ethical question of the month — September 2014. *The Canadian Veterinary Journal*, 55, 813-814. PMC4137920
- ROLLIN, B. E. 2014. Veterinary Medical Ethics Ethical Question of the Month August 2014. *The Canadian Veterinary Journal*, 55, 719-721. PMC4095959
- ROLLIN, B. E. 2014. Veterinary Medical Ethics Ethical Question of the Month February 2014. *The Canadian Veterinary Journal*, 55, 113-115. PMC3894866
- ROLLIN, B. E. 2014. Veterinary Medical Ethics Ethical Question of the Month January 2014. *The Canadian Veterinary Journal*, 55, 1195-1197. PMC3866848
- ROLLIN, B. E. 2014. Veterinary Medical Ethics Ethical Question of the Month July 2014. *The Canadian Veterinary Journal*, 55, 617-618. PMC4060904
- ROLLIN, B. E. 2014. Veterinary Medical Ethics Ethical Question of the Month March 2014. *The Canadian Veterinary Journal*, 55, 207-210. PMC3923475

ROLLIN, B. E. 2015. Veterinary Medical Ethics Ethical question of the month — April 2015. *The Canadian Veterinary Journal*, 56, 327-332. PMC4357903

ROLLIN, B. E. 2015. Veterinary Medical Ethics Ethical question of the month — August 2015. *The Canadian Veterinary Journal*, 56, 793-795. PMC4502845

ROLLIN, B. E. 2015. Veterinary Medical Ethics Ethical question of the month — July 2015. *The Canadian Veterinary Journal*, 56, 651-653. PMC4466815

ROLLIN, B. E. 2015. Veterinary Medical Ethics Ethical question of the month — June 2015. *The Canadian Veterinary Journal*, 56, 541-543. PMC4431147

ROLLIN, B. E. 2015. Veterinary Medical Ethics Ethical question of the month — March 2015. *The Canadian Veterinary Journal*, 56, 223-225. PMC4327131

ROLLIN, B. E. 2015. Veterinary Medical Ethics Ethical question of the month — May 2015. *The Canadian Veterinary Journal*, 56, 439-442. PMC4399726

ROLLIN, B. E. 2015. Veterinary Medical Ethics Ethical question of the month — November 2015. *The Canadian Veterinary Journal*, 56, 1117-1118. PMC4608462

ROLLIN, B. E. 2015. Veterinary Medical Ethics Ethical question of the month — October 2015. *The Canadian Veterinary Journal*, 56, 1013-1014. PMC4572813

ROLLIN, B. E. 2015. Veterinary Medical Ethics Ethical question of the month — September 2015. *The Canadian Veterinary Journal*, 56, 909-911. PMC4535503

ROLLIN, B. E. 2016. Veterinary Medical Ethics Ethical question of the month — April 2016. *The Canadian Veterinary Journal*, 57, 349-350. PMC4790224

ROLLIN, B. E. 2016. Veterinary Medical Ethics Ethical question of the month — August 2016. *The Canadian Veterinary Journal*, 57, 813-815. PMC4944556

ROLLIN, B. E. 2016. Veterinary Medical Ethics Ethical question of the month — December 2016. *The Canadian Veterinary Journal*, 57, 1221-1223. PMC5109622

ROLLIN, B. E. 2016. Veterinary Medical Ethics Ethical question of the month — February 2016. *The Canadian Veterinary Journal*, 57, 119-121. PMC4712986

ROLLIN, B. E. 2016. Veterinary Medical Ethics Ethical question of the month — January 2016. *The Canadian Veterinary Journal*, 57, 11-14. PMC4677603

ROLLIN, B. E. 2016. Veterinary Medical Ethics Ethical question of the month — July 2016. *The Canadian Veterinary Journal*, 57, 683-685. PMC4904805

ROLLIN, B. E. 2016. Veterinary Medical Ethics Ethical question of the month — June 2016. *The Canadian Veterinary Journal*, 57, 577-578. PMC4866660

ROLLIN, B. E. 2016. Veterinary Medical Ethics Ethical question of the month — March 2016. *The Canadian Veterinary Journal*, 57, 233-234. PMC4751761

ROLLIN, B. E. 2016. Veterinary Medical Ethics Ethical question of the month — May 2016. *The Canadian Veterinary Journal*, 57, 461-464. PMC4827733

ROLLIN, B. E. 2016. Veterinary Medical Ethics Ethical question of the month — October 2016. *The Canadian Veterinary Journal*, 57, 1025-1027. PMC5026141

- ROLLIN, B. E. 2016. Veterinary Medical Ethics Ethical question of the month — September 2016. *The Canadian Veterinary Journal*, 57, 917-919. PMC4982561
- ROLLIN, B. E. 2017. Veterinary Medical Ethics - Ethical Question of the month October 2017. *The Canadian Veterinary Journal* = *La revue veterinaire canadienne*, 58, 1025-1027. 28966352
- ROLLIN, B. E. 2017. Veterinary Medical Ethics - Ethical Question of the Month September 2017. *The Canadian Veterinary Journal* = *La revue veterinaire canadienne*, 58, 897-898. 28878411
- ROLLIN, B. E. 2017. Veterinary Medical Ethics Ethical question of the month — April 2017. *The Canadian Veterinary Journal*, 58, 333-335. PMC5347322
- ROLLIN, B. E. 2017. Veterinary Medical Ethics Ethical question of the month — February 2017. *The Canadian Veterinary Journal*, 58, 117-119. PMC5234310
- ROLLIN, B. E. 2017. Veterinary Medical Ethics Ethical question of the month — January 2017. *The Canadian Veterinary Journal*, 58, 15-16. PMC5157732
- ROLLIN, B. E. 2017. Veterinary Medical Ethics Ethical question of the month — July 2017. *The Canadian Veterinary Journal*, 58, 651-653. PMC5479659
- ROLLIN, B. E. 2017. Veterinary Medical Ethics Ethical question of the month — June 2017. *The Canadian Veterinary Journal*, 58, 541-543. PMC5432140
- ROLLIN, B. E. 2017. Veterinary Medical Ethics Ethical question of the month — May 2017. *The Canadian Veterinary Journal*, 58, 437-439. PMC5394599
- ROLLIN, B. E. 2018. Veterinary Medical Ethics. *The Canadian Veterinary Journal*, 59, 1261-1263. 30532283
- ROLLIN, B. E. 2018. Veterinary Medical Ethics. *The Canadian Veterinary Journal* = *La revue veterinaire canadienne*, 59, 1149-1151. 30410171
- ROLLIN, B. E. 2018. Veterinary Medical Ethics. *The Canadian Veterinary Journal* = *La revue veterinaire canadienne*, 59, 1045-1047. 30510307
- ROLLIN, B. E. 2018. Veterinary Medical Ethics. *The Canadian Veterinary Journal* = *La revue veterinaire canadienne*, 59, 935-937. 30197436
- ROLLIN, B. E. 2018. Veterinary Medical Ethics. *The Canadian Veterinary Journal* = *La revue veterinaire canadienne*, 59, 829-831. 30104772
- ROLLIN, B. E. 2018. Veterinary Medical Ethics - Ethical Question of the Month April 2018. *The Canadian Veterinary Journal* = *La revue veterinaire canadienne*, 59, 345-347. 29606720
- ROLLIN, B. E. 2018. Veterinary Medical Ethics - Ethical Question of the Month February 2018. *The Canadian Veterinary Journal* = *La revue veterinaire canadienne*, 59, 117-119. 29386670
- ROLLIN, B. E. 2018. Veterinary Medical Ethics - Ethical Question of the Month January 2018. *The Canadian Veterinary Journal* = *La revue veterinaire canadienne*, 59, 17-18. 29302098
- ROLLIN, B. E. 2018. Veterinary Medical Ethics - Ethical Question of the Month July 2018. *The Canadian Veterinary Journal* = *La revue veterinaire canadienne*, 59, 699-701. 30026617
- ROLLIN, B. E. 2018. Veterinary Medical Ethics - Ethical Question of the Month March 2018. *The Canadian Veterinary Journal* = *La revue veterinaire canadienne*, 59, 223-226. 29599552
- ROLLIN, B. E. 2019. Veterinary Medical Ethics: Ethical Question of the month. *The Canadian Veterinary Journal* = *La revue veterinaire canadienne*, 60, 13-16. 30651645

ROLLIN, B. E. 2019. Veterinary Medical Ethics: Ethical question of the month. *The Canadian Veterinary Journal = La revue vétérinaire canadienne*, 60, 123-125. 30705447

ROLLIN, B. E. 2019. Veterinary Medical Ethics: Ethical question of the month. *The Canadian Veterinary Journal = La revue vétérinaire canadienne*, 60, 229-230. 30872845

ROLLIN, B. E. 2019. Veterinary Medical Ethics: Ethical question of the month. *The Canadian Veterinary Journal = La revue vétérinaire canadienne*, 60, 1035-1036. 31597987

ROLLIN, B. E. 2019. Veterinary Medical Ethics: Ethical question of the month. *The Canadian Veterinary Journal = La revue vétérinaire canadienne*, 60, 821-822. PMC6625170

ROLLIN, B. E. 2019. Veterinary Medical Ethics: ethical question of the month. *The Canadian Veterinary Journal = La revue vétérinaire canadienne*, 60, 685-686. PMC6563879

ROLLIN, B. E. 2019. Veterinary Medical Ethics: ethical question of the month. *The Canadian Veterinary Journal = La revue vétérinaire canadienne*, 60, 1147-1148. PMC6799043

ROLLIN, B. E. 2019. Veterinary Medical Ethics: ethical question of the month. *The Canadian Veterinary Journal = La revue vétérinaire canadienne*, 60, 461-462. PMID31080256

ROLLIN, B.E. 2019. Veterinary Medical Ethics: ethical question of the month. *The Canadian Veterinary Journal = La revue vétérinaire canadienne*, 60, 355-356. PMID30992591

ROLLIN, B.E. 2019. Veterinary Medical Ethics: ethical question of the month. *The Canadian Veterinary Journal = La revue vétérinaire canadienne*, 60, 571-572. PMID: 31156255

ROLLIN, B. E. 2019. Veterinary Medical Ethics: ethical question of the month. *The Canadian Veterinary Journal = La revue vétérinaire canadienne*, 60, 925-926. PMC6697006

ROLLIN, B. E. 2019. Veterinary Medical Ethics: ethical question of the month. *The Canadian Veterinary Journal = La revue vétérinaire canadienne*, 60, 1261-1262. PMC6855224

ROLLIN, B. E. 2020. Veterinary Medical Ethics. *The Canadian veterinary journal = La revue vétérinaire canadienne*, 61, 9-10. 31892749

ROLLIN, B. E. 2020. Veterinary Medical Ethics. *The Canadian veterinary journal = La revue vétérinaire canadienne*, 61, 119-120. 32020927

ROLLIN, B. E. 2020. Veterinary Medical Ethics: ethical question of the month. *The Canadian Veterinary Journal = La revue vétérinaire canadienne*, 61, 239-230. PMID: 32165745

ROLLIN, B. E. 2020. Veterinary Medical Ethics: ethical question of the month. *The Canadian Veterinary Journal = La revue vétérinaire canadienne*, 61, 349-350. PMID: 32255820

ROLLIN, B. E. 2020. Veterinary Medical Ethics: ethical question of the month. *The Canadian Veterinary Journal = La revue vétérinaire canadienne*, 61, 463-464. PMC7155872

ROLLIN, B. E. 2020. Veterinary Medical Ethics: ethical question of the month. *The Canadian Veterinary Journal = La revue vétérinaire canadienne*, 61, 573-574. PMID: 32675808

ROLLIN, B. E. 2020. Veterinary Medical Ethics: ethical question of the month. *The Canadian Veterinary Journal = La revue vétérinaire canadienne*, 61, 677-678. PMID: 32655151

ROLLIN, B. E. 2020. Veterinary Medical Ethics: ethical question of the month. *The Canadian Veterinary Journal = La revue vétérinaire canadienne*, 61, 817-818. PMID: 32741989



- ROLLIN, B. E. 2020. Veterinary Medical Ethics: ethical question of the month. *The Canadian Veterinary Journal = La revue veterinaire canadienne*, 61, 923-924. PMID: 32879517
- ROLLIN, B. E. 2020. Veterinary Medical Ethics: ethical question of the month. *The Canadian Veterinary Journal = La revue veterinaire canadienne*, 61, 1035-1036. PMID: 33012817
- ROLLIN, B. E. 2020. Veterinary Medical Ethics: ethical question of the month. *The Canadian Veterinary Journal = La revue veterinaire canadienne*, 61, 1137-1138. PMID: 33149349
- ROLLIN, B. E. 2020. Veterinary Medical Ethics: ethical question of the month. *The Canadian Veterinary Journal = La revue veterinaire canadienne*, 61, 1243-1244. PMID: 33299239
- ROLLIN, B. E. & LUNETTA, L. 2000. An ethicist's commentary on euthanizing deaf Dalmatian puppies. *The Canadian Veterinary Journal = La revue veterinaire canadienne*, 41, 438-439. 10857029
- ROSS, K. & ROLLIN, B. 1994. An ethicist's commentary on whether veterinarians should report cruelty. *The Canadian Veterinary Journal = La revue veterinaire canadienne*, 35, 408-409. 8076287
- ROTH, M. & ROLLIN, B. E. 1995. An ethicist's commentary on the case of shipping animals that have experienced heavy metal toxicosis. *The Canadian Veterinary Journal = La revue veterinaire canadienne*, 36, 9-9. 7859224
- RUMNEY, J. & ROLLIN, B. E. 2000. An ethicist's commentary on whether ineffective medication should be permitted to be sold. *The Canadian Veterinary Journal*, 41, 354-354. PMC1476246
- RUMNEY, J. & ROLLIN, B. E. 2015. Veterinary Medical Ethics Ethical question of the month — December 2015. *The Canadian Veterinary Journal*, 56, 1217-1220. PMC4668808
- SAMSON, J. & ROLLIN, B. E. 1996. An ethicist's commentary on the case of the veterinarian asked to euthanize a healthy dog as a result of a client's last request. *The Canadian Veterinary Journal = La revue veterinaire canadienne*, 37, 393-393. 8809391
- SANDWITH, D. & ROLLIN, B. E. 2003. An ethicist's commentary on the "raw diet". *The Canadian Veterinary Journal = La revue veterinaire canadienne*, 44, 450-450. 12839239
- SAYERS, I. 2014. Everyday ethics: Giraffes greater good? *In Practice*, 36, 214. <https://doi.org/10.1136/inp.g2291>
- SCHORI, J. 2000. A question of conscience. *Veterinary Technician*, 21, 591-591. WOS:000169610600009
- SCHORI, J. 2000. A question of conscience: Dogfighting. *Veterinary Technician*, 21, 174-175. WOS:000166603300002
- SCHORI, J. 2001. A question of conscience. *Veterinary Technician*, 22, 256, 269. WOS:000169611300017
- SCHORI-DEERY, J. 2000. A question of conscience. *Veterinary Technician*, 21, 402-403. WOS:000169610200008
- SCHORI-DEERY, J. 2000. A question of conscience. *Veterinary Technician*, 21, 36-37. WOS:000084822600010
- SCHORI-DEERY, J. 2001. A Question of Conscience: declawing. *Veterinary Technician*, 22, 376. 1669295
- SILVA, S. 2011. Everyday ethics: Owner access to isolation facility webcam images. *In Practice*, 33, 558. <https://doi.org/10.1136/inp.d6600>
- SLIMMON, C. & ROLLIN, B. E. 1997. An ethicist's commentary on the case of the financially stressed client. *The Canadian Veterinary Journal = La revue veterinaire canadienne*, 38, 603-603. 9332744
- SMART, N. & ROLLIN, B. E. 1992. Veterinary medical ethics. *The Canadian Veterinary Journal = La revue veterinaire canadienne*, 33, 696-697. 17424111

- STABURSVIK, H. 2016. Everyday ethics: Changing established protocols. *In Practice*, 38, 94. <https://doi.org/10.1136/inp.i303>
- STEELE, M. 2011. Everyday ethics: regulation breach on farm. *In Practice*, 33, 362-363. <https://doi.org/10.1136/inp.d4499>
- STEVENSON, M. 2010. Everyday ethics: to refer or not? *In Practice*, 32, 122-123. <https://doi.org/10.1136/inp.c994>
- STOGDALE, L. & ROLLIN, B. E. 2002. An ethicist's commentary on the cloning the horse case. *The Canadian Veterinary Journal*, 43, 6-7. PMC339065
- STOGDALE, L. & ROLLIN, B. E. 2003. An ethicist's commentary on released time for voting, etc. *The Canadian Veterinary Journal*, 44, 537-537. PMC340189
- STOGDALE, L. & ROLLIN, B. E. 2006. Veterinary Medical Ethics Ethical Question of the Month September 2006. *The Canadian Veterinary Journal*, 47, 845-846. PMC1555695
- STOGDALE, L. & ROLLIN, B. E. 2007. Veterinary Medical Ethics Ethical Question of the Month June 2007. *The Canadian Veterinary Journal*, 48, 571-574. PMC1876183
- STOGDALE, L. & ROLLIN, B. E. 2007. Veterinary Medical Ethics Ethical Question of the Month May 2007. *The Canadian Veterinary Journal*, 48, 459-462. PMC1852594
- SVENSSON, S. H. 2020. Dealing with a case of suspected drug abuse in the practice. *In Practice*, 42, 133. <https://doi.org/10.1136/inp.m466>
- SWAN, P. 2006. Everyday ethics Coughing Cavalier. *In Practice*, 28, 104-104. <https://doi.org/10.1136/inpract.28.2.104>
- SWAN, P. 2008. Everyday ethics: ex-client with emergency. *In Practice*, 30, 476-477. <https://doi.org/10.1136/inpract.30.8.476>
- SWAN, P. 2010. Everyday ethics: Tethered dog dies. *In Practice*, 32, 514. <https://doi.org/10.1136/inp.c5959>
- THOMAS, L. & ROLLIN, B. E. 2014. Veterinary Medical Ethics Ethical question of the month — November 2014. *The Canadian Veterinary Journal*, 55, 1021-1025. PMC4204832
- TIPLADY, C. M. & LAWRIE, M. 2011. Ethical dilemma - Cassie. *Australian Veterinary Journal*, 89, N20-21. <https://doi.org/10.1111/j.1751-0813.2011.00862.x>
- TIPLADY, C. M. & STEPHENS, T. 2014. Euthanasia of a greyhound. *Australian Veterinary Journal*, 92, N28-29.
- TRAN, C. V. 2016. Cyberbullying. In: TRAN, C. V., DESANTIS KERR, A., BILL, R. & WALSH, J. S. (eds.) *Exploring the Gray Zone*. Purdue University Press. <https://doi.org/10.2307/j.ctt163t7qs.32>
- TRAN, C. V. 2016. Forbid or Forget? In: TRAN, C. V., DESANTIS KERR, A., BILL, R. & WALSH, J. S. (eds.) *Exploring the Gray Zone*. Purdue University Press. <https://doi.org/10.2307/j.ctt163t7qs.22>
- TRAN, C. V. 2016. Hospital Volunteer. In: TRAN, C. V., DESANTIS KERR, A., BILL, R. & WALSH, J. S. (eds.) *Exploring the Gray Zone*. Purdue University Press. <https://doi.org/10.2307/j.ctt163t7qs.14>
- TRAN, C. V. 2016. How Rough is Too Rough? In: TRAN, C. V., DESANTIS KERR, A., BILL, R. & WALSH, J. S. (eds.) *Exploring the Gray Zone*. Purdue University Press. <https://doi.org/10.2307/j.ctt163t7qs.27>
- TRAN, C. V. 2016. Ringworm Kitten at the Babysitters. In: TRAN, C. V., DESANTIS KERR, A., BILL, R. & WALSH, J. S. (eds.) *Exploring the Gray Zone*. Purdue University Press. <https://doi.org/10.2307/j.ctt163t7qs.25>

- TRAN, C. V. 2016. Sharing the Hidden Truth. *In*: TRAN, C. V., DESANTIS KERR, A., BILL, R. & WALSH, J. S. (eds.) *Exploring the Gray Zone*. Purdue University Press. <https://doi.org/10.2307/j.ctt163t7qs.7>
- TREMBLAY, R. & ROLLIN, B. E. 1991. Veterinary medical ethics. *The Canadian Veterinary Journal = La revue veterinaire canadienne*, 32, 268-269. 17423781
- TURNER, A. 2015. Everyday ethics: 'Off colour' alpaca. *In Practice*, 37, 430. <https://doi.org/10.1136/inp.h4390>
- UEHLINGER, F. 2013. Everyday ethics: The cow that got up. *In Practice*, 35, 542. <https://doi.org/10.1136/inp.f5551>
- WALSH, D. J. 2016. A Business on the Side. *In*: DESANTIS KERR, A., BILL, R., X201C, PETE, X201D, WALSH, J. S. & TRAN, C. V. (eds.) *Exploring the Gray Zone*. Purdue University Press. <https://doi.org/10.2307/j.ctt163t7qs.29>
- WALSH, J. 2016. Employee Leaving: What to Tell the Clients? *In*: TRAN, C. V., DESANTIS KERR, A., BILL, R. & WALSH, J. S. (eds.) *Exploring the Gray Zone*. Purdue University Press. <https://doi.org/10.2307/j.ctt163t7qs.11>
- WALSH, J. 2016. Hiring in a Close Community. *In*: TRAN, C. V., DESANTIS KERR, A., BILL, R. & WALSH, J. S. (eds.) *Exploring the Gray Zone*. Purdue University Press. <https://doi.org/10.2307/j.ctt163t7qs.24>
- WALSH, J. 2016. Is It Discrimination? *In*: TRAN, C. V., DESANTIS KERR, A., BILL, R. & WALSH, J. S. (eds.) *Exploring the Gray Zone*. Purdue University Press. <https://doi.org/10.2307/j.ctt163t7qs.20>
- WALSH, J. 2016. Social Media Not as private as You Think. *In*: TRAN, C. V., DESANTIS KERR, A., BILL, R. & WALSH, J. S. (eds.) *Exploring the Gray Zone*. Purdue University Press. <https://doi.org/10.2307/j.ctt163t7qs.9>
- WALSH, J. 2016. Well-Intentioned Friend? *In*: TRAN, C. V., DESANTIS KERR, A., BILL, R. & WALSH, J. S. (eds.) *Exploring the Gray Zone*. Purdue University Press. <https://doi.org/10.2307/j.ctt163t7qs.21>
- WALSH, J. 2016. Who Makes the Call? *In*: TRAN, C. V., DESANTIS KERR, A., BILL, R. & WALSH, J. S. (eds.) *Exploring the Gray Zone*. Purdue University Press. <https://doi.org/10.2307/j.ctt163t7qs.26>
- WATTS, M. 2007. Everyday ethics: Injured greyhound. *In Practice*, 29, 118. <https://doi.org/10.1136/inpract.29.2.118>
- WELLS, K. 2012. Everyday ethics: accommodating cultural differences of opinion. *In Practice*, 34, 310-311. <https://doi.org/10.1136/inp.e2846>
- WELSH, P. 2003. VNs and the Law What Would You Do? *Veterinary Nursing Journal*, 18, 117-120. <https://doi.org/10.1080/17415349.2003.11013225>
- WENSLEY, S. 2012. Everyday ethics: Genetic testing for coat colour in cats. *In Practice*, 34, 174. <https://doi.org/10.1136/inp.e1130>
- WHITING, M. 2012. Everyday ethics: Homeopathic vaccine. *In Practice*, 34, 430. <https://doi.org/10.1136/inp.e4325>
- WHITING, M. 2013. Everyday ethics: Vaccinations and the Animal Welfare Act. *In Practice*, 35, 102. <https://doi.org/10.1136/inp.f172>
- WHITING, T. & ROLLIN, B. E. 1992. Veterinary medical ethics. *The Canadian Veterinary Journal = La revue - veterinaire canadienne*, 33, 486-488. 17424052
- WHITING, T. & ROLLIN, B. E. 2003. An ethicist's commentary on the dairy with bad husbandry. *The Canadian Veterinary Journal*, 44, 787-788. PMC340286
- WHITING, T. & ROLLIN, B. E. 2017. Veterinary Medical Ethics Ethical question of the month — March 2017. *The Canadian Veterinary Journal*, 58, 221-222. PMC5302195

- WILD, S. 2017. Legal and ethical veterinary practice: a scenario evaluation. *Veterinary Nursing Journal*, 32, 45-49. <https://doi.org/10.1080/17415349.2016.1259833>
- WILLIAMS, D. 2012. Everyday ethics: offering neighbourly advice. *In Practice*, 34, 366-366. <https://doi.org/10.1136/inp.e3232>
- WILLIAMS, D. 2012. Everyday ethics: repeat vaccinations. *In Practice*, 34, 246-247. <https://doi.org/10.1136/inp.e1500>
- WILLIAMS, D. 2013. Everyday ethics: A corneal cat-astrophe? *In Practice*, 35, 46. <https://doi.org/10.1136/inp.e8207>
- WILLIAMS, D. 2018. Everyday ethics: A night at the races. *In Practice*, 40, 262. <https://doi.org/10.1136/inp.k2825>
- WILLIAMS, D. 2018. Everyday ethics: Cleft palate in boxer puppies. *In Practice*, 40, 214. <https://doi.org/10.1136/inp.k2245>
- WILLIAMS, D. 2018. Everyday ethics: Is this nice for mice? *In Practice*, 40, 422. <https://doi.org/10.1136/inp.k4477>
- WILLIAMS, D. 2019. Blocked cats and limited finances: an ethical obstruction? *In Practice*, 41, 94-5. <https://doi.org/10.1136/inp.l790>
- WILLIAMS, D. 2019. Not a dry eye in the house: treating rescue dogs with off-licence cyclosporine. *In Practice*, 41, 230-1. <https://doi.org/10.1136/inp.l3094>
- WOOD, K. & ROLLIN, B. E. 2010. Veterinary Medical Ethics Ethical Question of the Month September 2010. *The Canadian Veterinary Journal*, 51, 935-936. PMC2920168
- WOOD, S. 2011. The professional, legal and ethical issues in VN: a scenario. *The Veterinary Nurse*, 2, 164-168. <https://doi.org/10.12968/vetn.2011.2.3.164>
- WOODWARD, R. 2018. Everyday ethics: An inconsequential overdose. *In Practice*, 40, 366. <https://doi.org/10.1136/inp.k4068>
- WRIGHT, B. & ROLLIN, B. E. 2004. An ethicist's commentary on cultural bias in animal use. *The Canadian Veterinary Journal = La revue veterinaire canadienne*, 45, 555-555. 15317389
- WRIGHT, R. & ROLLIN, B. E. 1997. An ethicist's commentary on the case of the veterinarian who wishes to improve rural euthanasia. *The Canadian Veterinary Journal = La revue veterinaire canadienne*, 38, 334-335. 9187800
- WRIGHT, R. & ROLLIN, B. E. 2008. Veterinary Medical Ethics Ethical Question of the Month November 2008. *The Canadian Veterinary Journal*, 49, 1067-1072. PMC2572091
- WU, C. 2019. Dealing with the elderly client who can no longer manage their pet's care. *In Practice*, 41, 397. <https://doi.org/10.1136/inp.l5726>
- YEATES, J. 2006. Everyday ethics: Owner's dying wish. *In Practice*, 28, 623-624. <https://doi.org/10.1136/inpract.28.10.623>
- YEATES, J. 2008. Everyday ethics: Obese Dog. *In Practice*, 30, 173-173. <https://doi.org/10.1136/inpract.30.3.173>
- YEATES, J. 2009. Everyday ethics: prize draw with a difference. *In Practice*, 31, 43-43. <https://doi.org/10.1136/inpract.31.1.43>
- YEATES, J. 2010. Everyday ethics: to treat or not? *In Practice*, 32, 458-459. <https://doi.org/10.1136/inp.c5054>
- ZURRBRIGG, K. & ROLLIN, B. E. 2011. Veterinary Medical Ethics Ethical Question of the Month October 2011. *The Canadian Veterinary Journal*, 52, 1047-1050. PMC3174500
